# Optimal Therapy Scheduling Based on a Pair of Collaterally Sensitive Drugs

Nara Yoon, Robert Vander Velde, Andriy Marusyk and Jacob G. Scott

February 20, 2018

## Abstract

Despite major strides in the treatment of cancer, the development of drug resistance remains a major hurdle. One strategy which has been proposed to address this is the sequential application of drug therapies where resistance to one drug induces sensitivity to another drug, a concept called collateral sensitivity. The optimal timing of drug switching in these situations, however, remains unknown.

To study this, we developed a dynamical model of sequential therapy on heterogeneous tumors comprised of resistant and sensitive cells. A pair of drugs (*DrugA*, *DrugB*) are utilized and are periodically switched during therapy. Assuming resistant cells to one drug are collaterally sensitive to the opposing drug, we classified cancer cells into two groups,  $A_R$  and  $B_R$ , each of which is a subpopulation of cells resistant to the indicated drug and concurrently sensitive to the other, and we subsequently explored the resulting population dynamics.

Specifically, based on a system of ordinary differential equations for  $A_R$  and  $B_R$ , we determined that the optimal treatment strategy consists of two stages: an initial stage in which a chosen effective drug is utilized until a specific time point,  $T$ , and a second stage in which drugs are switched repeatedly, during which each drug is used for a relative duration (i.e.  $f\Delta t$ -long for *DrugA* and  $(1-f)\Delta t$ -long for *DrugB* with  $0 \leq f \leq 1$  and  $\Delta t \geq 0$ ). We prove that the optimal duration of the initial stage, in which the first drug is administered,  $T$ , is shorter than the period in which it remains effective in decreasing the total population, contrary to current clinical intuition.

We further analyzed the relationship between population makeup,  $\mathcal{A}/\mathcal{B} = A_R/B_R$ , and the effect of each drug. We determine a critical ratio, which we term  $(\mathcal{A}/\mathcal{B})^*$ , at which the two drugs are equally effective. As the first stage of the optimal strategy is applied,  $\mathcal{A}/\mathcal{B}$  changes monotonically to  $(\mathcal{A}/\mathcal{B})^*$  and then, during the second stage, remains at  $(\mathcal{A}/\mathcal{B})^*$  thereafter.

Beyond our analytic results, we explored an individual based stochastic model and presented the distribution of extinction times for the classes of solutions found. Taken together, our results suggest opportunities to improve therapy scheduling in clinical oncology.

## 1 Introduction

Drug resistance is observed in many patients after exposure to cancer therapy, and is a major hurdle in cancer therapy [1]. In most cases, treatment with appropriate chemo- or targeted therapy reliably reduces tumor burden upon initiation. However, in the majority of cases, resistance inevitably arises, and the disease relapses [2]. The observation of relapse is typically accomplished during surveillance through imaging, or in some cases a blood based marker [3, 4]. Disease recurrence is observed, at the earliest, when the disease burden reaches some threshold of detection, at which

35 point the first line therapy is deemed to have failed and a second line drug is used to control the  
36 disease (see Figure 1 (a)). We argue herein that a redesign of treatment should start earlier than this  
37 time point, not only because the detection threshold is higher than the minimum disease burden,  
38 but also because the first drug could become less efficient as the duration of therapy reaches  $T_{max}$ .  
39 In this research, we focus on the latter reason and figure out how much earlier we should switch  
40 drug in advance of  $T_{max}$ , assuming that the former reason is less important ( $t_{DT} - t_o \approx T_{max}$ ).

41 While for many years it was assumed that tumors were simply collections of clonal cells, it is  
42 now accepted that tumor heterogeneity is the rule [5]. The simplest manifestation of this hetero-  
43 geneity can be represented by considering the existence of both therapy resistant and sensitive cell  
44 types co-existing prior to therapy [6], with the future cellular composition shaped by the choice  
45 of drugs (illustrated in Figure 1 (b)). Beyond simple selection for resistant cells, cells can also  
46 become altered toward a resistant state during treatment, either by (i) genetic mutations [7, 8] or  
47 (ii) phenotypic plasticity and resulting epigenetic modifications [9, 10, 11].

48 To combat resistance, many strategies have been attempted, including multi-drug therapies tar-  
49 getting more than one cell-type at a time. While multi-drug therapy has enjoyed successes in many  
50 cancers, especially pediatric ones, the resulting combinations can often be very toxic. Further,  
51 recent work has suggested that the success of multi-drug therapy at the population level is likely  
52 overstated in individuals, given intra-patient heterogeneity [12]. Recently, researchers have sought  
53 specific sequential single drug applications that induce sensitivity, a concept is called collateral  
54 sensitivity [13, 14, 15, 16]. In some cases, several drugs used sequentially can complete a collateral  
55 sensitivity cycle [15, 14], and corresponding periodic drug sequence can be used in the prescription  
56 of long term therapies – though the continued efficacy of this cycle is not guaranteed [17]. In this  
57 research, we focus on a drug cycle comprised of just two drugs, each of which can be used as a  
58 targeted therapy against cells that have evolved resistance to the previous drug (illustrated in Figure  
59 1 (b)).

60 The underlying dynamics of resistance development has previously been studied using cell  
61 populations consisting of treatment sensitive and resistant types, using either genotypic or phe-  
62 notypic classifications [18]. Additionally, others have justified their choices of detailed cellu-  
63 lar heterogeneities using: (i) stages in evolutionary structures [19, 20], (ii) phases of cell cycle  
64 [21, 22, 23, 24], or (iii) spatial distribution of irregular therapy effect [25, 26]. Among these, re-  
65 searchers (including [18, 22, 23, 27, 28]) have studied the effect of a pair of collaterally sensitive  
66 drugs as we propose here, using the Goldie-Coldman model or its variations [19, 28, 29, 30]. These  
67 models utilize a population structure consisting of four compartments, each of which represents a  
68 subpopulation that is either (i) sensitive to the both drugs, (ii) and (iii) resistant to one drug respec-  
69 tively, or (iv) resistant to both.

70 In this manuscript we propose a modeling approach which is the minimal model sufficient to  
71 study the effects of two populations of cells and two collaterally sensitive drugs. The model's sim-  
72 plicity facilitates exact mathematical derivations of useful concepts and quantities, and illustrates  
73 several novel concepts relevant to adaptive therapy. The remainder of the manuscript is structured  
74 as follows. In Section 2, we outline the model and define terms. In Section 3 we present analysis of  
75 drug switch timing and duration. In Section 4 we relax several assumptions in our analytic model  
76 and study extinction times in a stochastic formulation, which agrees well with analysis in the mean  
77 field. In Section 5 we conclude and present work for future directions.

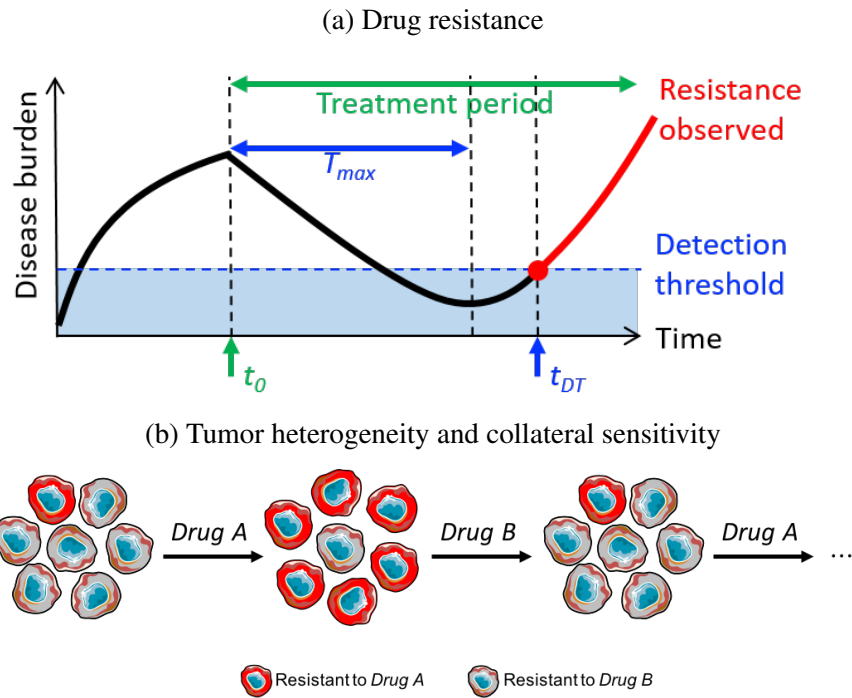

Figure 1: (a) General dynamical pattern of disease burden. It increases initially and then decreases as of the therapy starting point ( $t_0$ ), and eventually rebounds after the maximum period with positive therapy effect ( $T_{max}$ ). Relapse is found, at the earliest, when disease burden reaches detection threshold at  $t_{DT}$ . (b) Change in composition of tumor cell population when a pair of collaterally sensitive drugs are given one after another.

## 78 2 Modeling setup

### 79 2.1 Basic cell population dynamics under a single drug administration

80 Based on the sensitivity and resistance to a therapy, the cell population can be split into two groups.  
 81 We refer to the population sizes of sensitive cells and resistant cells as  $C_S$  and  $C_R$  respectively, and  
 82 then use the total cell population size,  $C_P := C_S + C_R$ , to measure disease burden and drug effect.

83 We account for three dynamical events in our model: proliferation of sensitive ( $s$ ) and resis-  
 84 tant cells ( $r$ ), and transition between these cell types ( $g$ ). Here, net proliferation rate represents  
 85 combined birth and death rate, which can be positive if the birth rate is higher than the death rate  
 86 or negative otherwise. It is reasonable to assume that, in the presence of drug, the sensitive cell  
 87 population size declines ( $s < 0$ ), resistant cell population size increases ( $r > 0$ ), and that  $g > 0$ .  
 88 Therefore, for the remainder of the work we consider only conditions in which  $s < 0$ ,  $r > 0$  and  
 89  $g > 0$ .

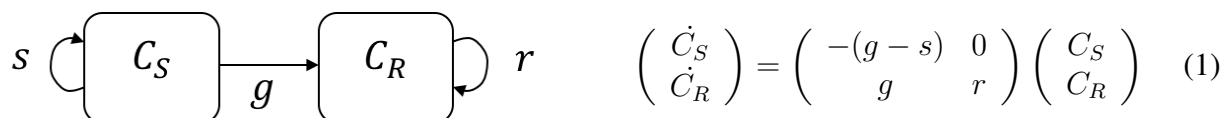

Figure 2: **Schematic of dynamics between sensitive cells population,  $C_S$ , and resistant cells population,  $C_R$ , (left panel) and the differential system of  $\{C_S, C_R\}$  (right panel)** with  $s$ –proliferation rate of sensitive cells,  $r$ –proliferation rate of resistant cells,  $g$ –transition rate from  $C_S$  to  $C_R$

90 Figure 2 illustrates the population dynamics, and the system of ordinary differential equations  
 91 that  $\{C_S, C_R\}$  obey. The solution of the system (1) is

$$\begin{pmatrix} C_S(t) \\ C_R(t) \end{pmatrix} = \begin{pmatrix} e^{-(g-s)t} & 0 \\ g(e^{rt} - e^{-(g-s)t}) & e^{rt} \end{pmatrix} \begin{pmatrix} C_S^0 \\ C_R^0 \end{pmatrix}, \quad (2)$$

92 where  $\{C_S(0), C_R(0)\} = \{C_S^0, C_R^0\}$ . By (2), total population is

$$C_P(t|\{s, r, g\}, \{C_S^0, C_R^0\}) = \left(\frac{r-s}{g+r-s}C_S^0\right)e^{-(g-s)t} + \left(\frac{g(C_S^0 + C_R^0) + (r-s)C_R^0}{g+r-s}\right)e^{rt}. \quad (3)$$

93  $C_P(t)$  is a positive function comprised of a linear combination of exponential growth ( $e^{rt}$ ) and  
 94 exponential decay ( $e^{-(g-s)t}$ ) with positive coefficients. Despite the limitations of simple exponen-  
 95 tial growth models [31], we feel it is a reasonable place to start, since the relapse of tumor size starts  
 96 when it is much smaller than its carrying capacity which results in almost exponential growth.

97  $C_P$  has one and only one minimum point in  $\{-\infty, \infty\}$ , after which  $C_P$  increases monotonically.  
 98 If  $C'_P(0) = sC_S^0 + rC_R^0 \geq 0$ , the drug is inefficient ( $C_P(t)$  is increasing on  $t \geq 0$ , see an example  
 99 on Figure 3 (a)). Otherwise, if  $C'_P(0) < 0$ , the drug is effective in reducing tumor burden at the  
 100 beginning, although it will eventually regrow (due to drug resistance; see example in Figure 3 (b)).

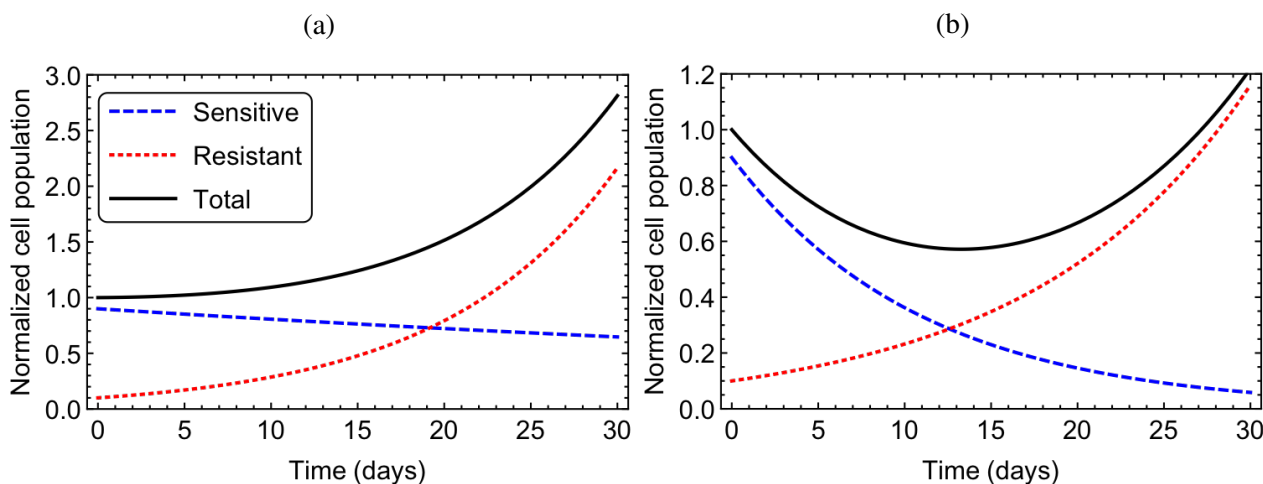

Figure 3: **Two representative population histories showing qualitatively different behaviors** depending on drug parameters with fixed initial population,  $\{C_S^0, C_R^0\} = \{0.9, 0.1\}$ . (a) increasing total population with  $\{s, r, g\} = \{-0.01, 0.1, 0.001\}$ ;  $C'_P(0) = 0.001 > 0$ . (b) rebounding total population with  $\{s, r, g\} = \{-0.09, 0.08, 0.001\}$ ;  $C'_P(0) = -0.073 < 0$ .

## 101 2.2 Cell population dynamics with a pair of collateral sensitivity drugs

102 Here we describe the effect of sequential therapy with two drugs switched in turn, by extending  
 103 the model for a single-drug administration (System (1)). Assuming that the drugs are collaterally  
 104 sensitive to each other, cell population is classified into just two groups reacting to the two types  
 105 of drugs in opposite ways. Depending on which drug is administered, cells in the two groups will  
 106 have different proliferation rates and direction of cell-type transition (see Figure 4). That is, the  
 107 population dynamics of the two groups follow a piecewise continuous differential system consisting

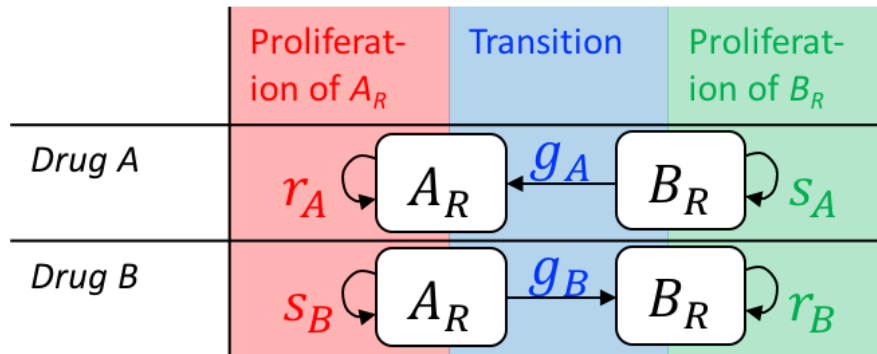

Figure 4: **Dynamics of two cell subpopulations ( $A_R, B_R$ ), which is opposite in direction under the present of collaterally sensitive drugs ( $DrugA, DrugB$ ).**  $A_R$  is population of cells, resistant only to  $DrugA$ , and the  $B_R$  population of cells, resistant only to  $DrugB$  in the presence of  $DrugA$  or  $DrugB$ . For each drug therapy, accounted cellular events are proliferations of sensitive and resistance cells ( $\{s, r\}$ , colored red and green) and drug-induced transitions from sensitive type to resistance type ( $g$  colored blue).

108 of a series of the system (1), each of which is assigned to a time slot bounded by drug-switching  
109 times.

110 In summary, we assume that:

- 111 • There is a pair of collaterally sensitive drugs,  $DrugA$  and  $DrugB$ , which are characterized  
112 by their own model parameters:  $p_A = \{s_A, r_A, g_A\}$  and  $p_B = \{s_B, r_B, g_B\}$  respectively,
- 113 • A modeled tumor can be characterized entirely by two subpopulations,  $A_R$  - resistant to  
114  $DrugA$  and simultaneously sensitive to  $DrugB$ , and  $B_R$  - resistant to  $DrugB$  and simulta-  
115 neously sensitive to  $DrugA$ .
- 116 • Three factors determine the dynamical patterns, (i) drug parameters,  $\{p_A, p_B\}$ , (ii) the initial  
117 population sizes,  $\{A_R(0), B_R(0)\}$ , and (iii) the drug switching schedule.

118 An example of  $\{A_R, B_R, A_R + B_R\}$  histories is shown in Figure 5.

### 119 3 Analysis of therapy scheduling

#### 120 3.1 Drug-switch timing

121 To begin exploring the possible strategies of drug switching and timing within our model, we first  
122 tested an idea based on clinical intuition. As we discussed, the norm in the clinic is to change drugs  
123 when failure is *observed* either radiographically or through a bio-marker. We know, however, that  
124 the true failure occurs somewhat before this, yet at that time it is below the threshold of detection.  
125 To model drug switching at the point of 'true failure', the intuitive (yet unobservable) time point  
126 when the tumor population begins to rebound, we switch the drugs at the global minimum point of  
127 tumor size which we term  $T_{max}$  (see Figure 1a), which was shown to exist uniquely in the previous  
128 section if and only if  $C_R(0)/C_S(0) < -s/r$ . The expression for  $T_{max}$ , derived from our model, is

$$T_{max}(\{s, r, g\}, (\mathcal{R}/\mathcal{S})_0) = \frac{\ln \left[ \frac{(g-s)(r-s)}{r(g((\mathcal{R}/\mathcal{S})_0 + 1) + (r-s)(\mathcal{R}/\mathcal{S})_0)} \right]}{g+r-s}. \quad (4)$$

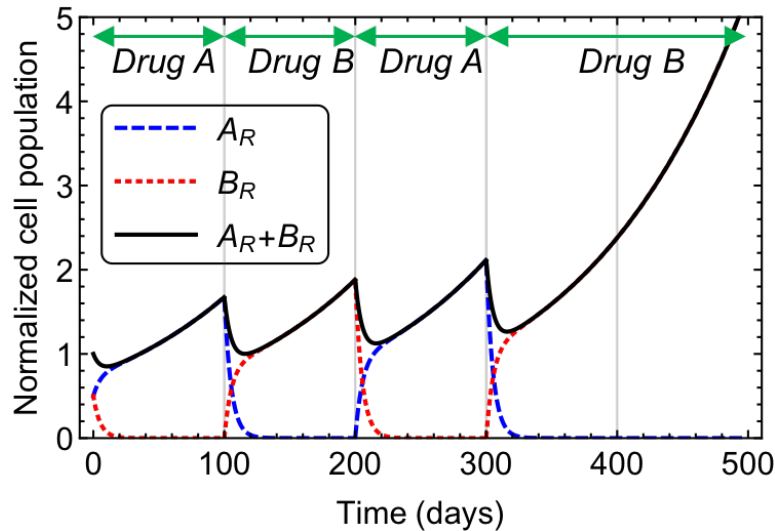

Figure 5: **Representative plots demonstrating the dynamics of cell populations.** Shown are population curves either resistant to *DrugA* ( $A_R$ ) or resistant to *DrugB* ( $B_R$ ), as well as the total population ( $A_R + B_R$ ) during drug switches. Here,  $p_A = p_B = \{-0.9, 0.08, 0.1\}/\text{day}$  and  $\{A_R(0), B_R(0)\} = \{0.5, 0.5\}$ .

129 with  $(\mathcal{R}/\mathcal{S})_0 := C_R(0)/C_S(0)$ . (See Appendix A.1 for this derivation.)

130  
131 We see that the quantity  $T_{max}$  depends only on (i) the parameters of the drug being administered,  
132 and (ii) the initial population makeup. In the *DrugA*-based therapy, it is  $T_{max}(p_A, (\mathcal{A}/\mathcal{B})_0)$ , and in  
133 the *DrugB*-based therapy, it is  $T_{max}(p_B, 1/(\mathcal{A}/\mathcal{B})_0)$ , where  $(\mathcal{A}/\mathcal{B})_0 = A_R(0)/B_R(0)$ .

134 In addition to  $T_{max}$ , another important time point is  $T_{min}$ , explained below. Since the rate of  
135 population decrease is almost zero around  $T_{max}$ , with no switch (see the black curve of Figure 6),  
136 we seek to find a way to extend the high rate of population decrease by switching drugs before  
137  $T_{max}$ . To decide how much earlier to do so, we compared the derivative of  $C_P$  under constant  
138 selective pressure (no switch) at an arbitrary time point,  $t_1$ , and compared it to the right derivative  
139 of  $C_P$  at  $t_1$  with the drug-switch assigned to  $t_1$ .

140 For example, if the first drug is *DrugA* and the follow-up drug is *DrugB* (illustrated in Figure  
141 6), we compare

$$C'_P(0|p_A, \{B_R(t_1), A_R(t_1)\}) \text{ and } C'_P(0|p_B, \{A_R(t_1), B_R(t_1)\})$$

142 from (3). This comparison reveals that the two derivatives are equal iff  $t_1$  is a specific point ( $T_{min}$   
143 (see the yellow curve in Figure 6)) The derivative when the drugs are switched is lower (decreasing  
144 faster) iff  $t_1 > T_{min}$  (see the blue and green curves in Figure 6), and the derivative when the drugs  
145 are not switched is lower iff  $t_1 < T_{min}$  (see the red curve in Figure 6).

146 The general form of  $T_{min}$  depends on the parameters of the “pre-switch” drug  $\{s_1, r_1, g_1\}$  and  
147 for the “post-switch” drug  $\{s_2, r_2\}$ , as well as the initial population ratio between resistant cells and  
148 sensitive cells to the “pre-switch” drug,  $(\mathcal{R}/\mathcal{S})_0$  (See Appendix A.1 for details derivation). Here,  
149 the transition parameter in the second drug ( $g_2$ ), and the respective values of the two populations  
150 are unnecessary in the evaluation of  $T_{min}$ , which is found to be

$$T_{min}(\{s_1, r_1, g_1\}, \{s_2, r_2\}, (\mathcal{R}/\mathcal{S})_0) = \frac{\ln \left[ \frac{(r_1 - s_1)(r_2 - s_1) + g_1(r_1 + r_2 - s_1 - s_2)}{(r_1 - s_2)(g_1 + (g_1 + r_1 - s_1)(\mathcal{R}/\mathcal{S})_0)} \right]}{g_1 + r_1 - s_1}. \quad (5)$$

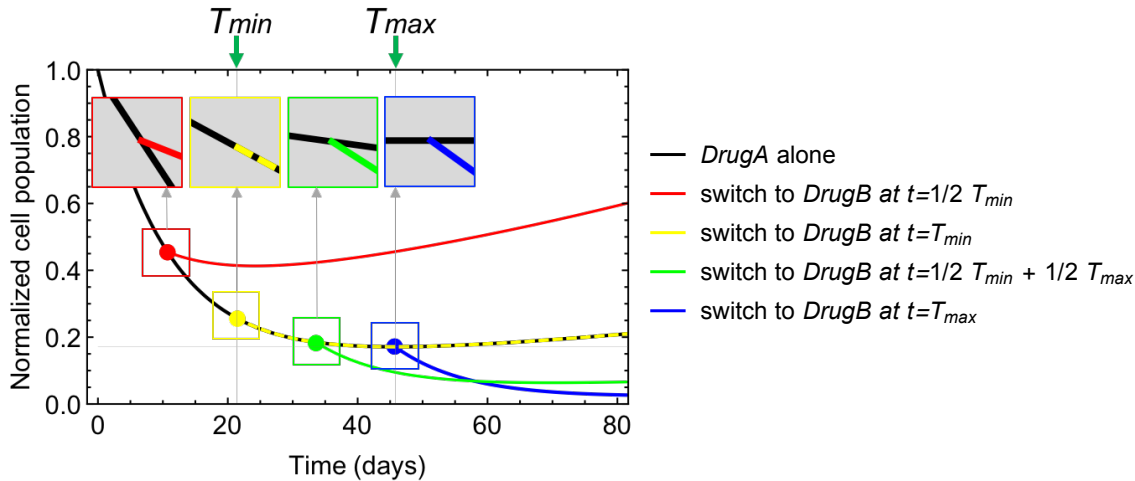

Figure 6: **Comparison of total population curves with a one-time drug-switch from *DrugA* to *DrugB* at different time points** (i) at  $< T_{min}$  (worse than without-switch; red curve), (ii) at  $T_{min}$  (same as without-switch; yellow curve), (iii) between  $T_{min}$  and  $T_{max}$  (better than without-switch; green curve), and (iv)  $T_{max}$  (better than without-switch; blue curve). Each color represents cell population size during and after a drug-switch using each switching strategy. The dashed yellow and black curve represents the overlap between the yellow and black curves. The tangent lines of the population curves at the chosen drug-switch time points are illustrated above. Parameters:  $p_A = p_B = \{-0.9, 0.08, 0.001\}/\text{day}$  and  $\{A_R(0), B_R(0)\} = \{0.1, 0.9\}$ .

151 In the *DrugA*-to-*DrugB* switch, it is  $T_{min}(p_A, p_B, (\mathcal{A}/\mathcal{B})_0)$ , and in the *DrugB*-to-*DrugA* switch,  
 152 it is  $T_{min}(p_B, p_A, 1/(\mathcal{A}/\mathcal{B})_0)$ , where  $(\mathcal{A}/\mathcal{B})_0 = A_R(0)/B_R(0)$ .

153 It is important to note that the population curve with a single drug-switch after  $T_{min}$  (and before  
 154  $T_{max}$ , assuming that  $T_{min} < T_{max}$ ) is not guaranteed to be lower than that of a single drug-switch  
 155 switch at  $T_{max}$  over the entire time range. As an example, as illustrated in Figure 6, the green curve  
 156 relevant to the switch at  $(T_{min} + T_{max})/2$  and the blue curve relevant to the switch at  $T_{max}$  intersect  
 157 at  $t \approx 58$  and the blue curve is lower after the time of this intersection. However, sequential drug  
 158 switches starting between  $T_{min}$  and  $T_{max}$  create the possibility of finding a better drug schedule than  
 159 the  $T_{max}$ -based strategy. Figure 7 shows possible choices of follow up switches (green and black  
 160 curves) which achieve better results than a  $T_{max}$ -switch (red curves), unlike the drug-switches  
 161 starting before  $T_{min}$ , which remain less effective (magenta curve).

162 The optimal drug switching scheme will be discussed in detail in Section 4.2. The optimal  
 163 scheduling for the example shown in Figure 5 starts by using the first drug until  $T_{min}$  (blue curve  
 164 for  $0 < t \leq T_{min}$ ) followed by a rapid exchange of the two drugs afterwards (black curve for  
 165  $t > T_{min}$ ). Switching before  $T_{max}$ , that is, before the drug has had its full effect, goes somewhat  
 166 against clinical intuition, and is therefore an opportunity for unrealized clinical improvement based  
 167 on a rationally scheduled switch at  $T_{min}$ . In order to realize this however, there are conditions about  
 168 the order of  $T_{max}$  and  $T_{min}$  which must be satisfied. In particular:

$$\begin{cases} T_{min} < T_{max} & \text{iff } r_1 r_2 < s_1 s_2 \\ T_{min} = T_{max} & \text{iff } r_1 r_2 = s_1 s_2 \\ T_{min} > T_{max} & \text{iff } r_1 r_2 > s_1 s_2. \end{cases} \quad (6)$$

169 In our analysis and simulations, we will deal with the cases mostly satisfying  $r_1 r_2 < s_1 s_2$ , as  
 170 otherwise the choice of drugs is not powerful to reduce the cell population (explained in detail in  
 171 the next section and Figure 8).

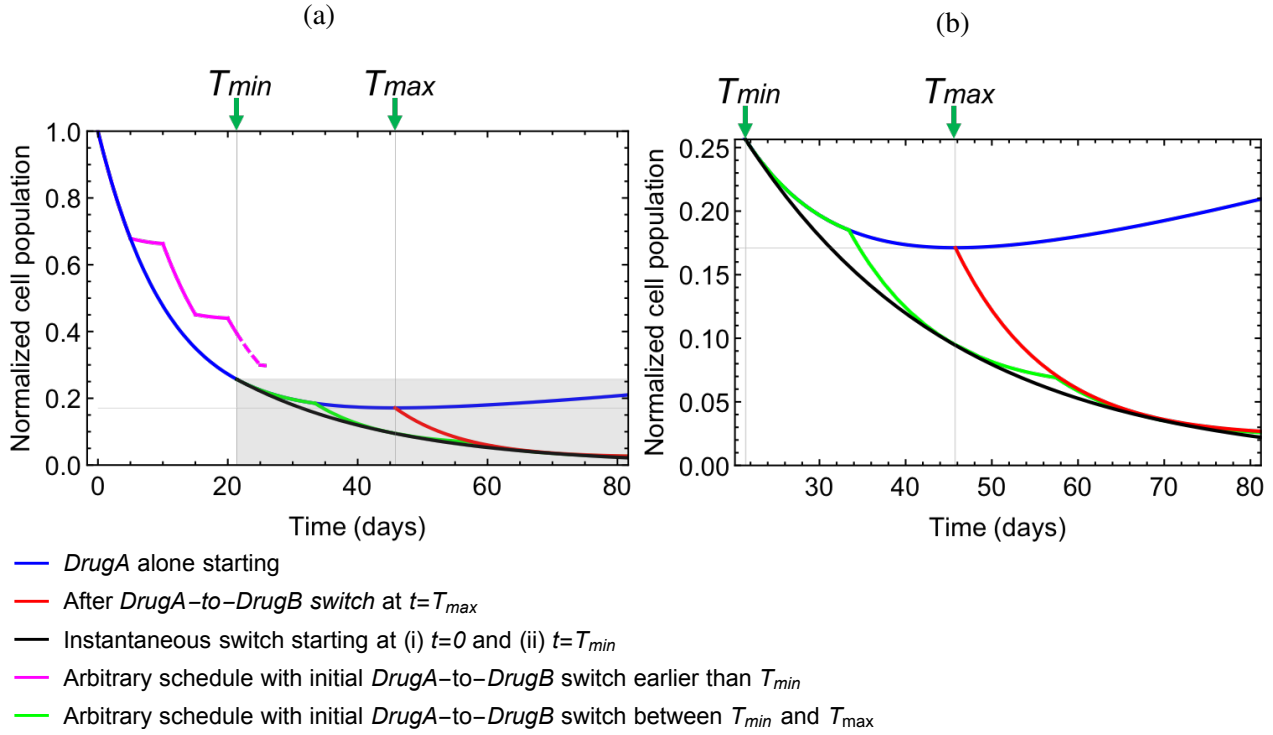

Figure 7: Total population curves with different therapy strategies with  $p_A = p_B = \{-0.9, 0.08, 0.001\}/day$  and  $\{A_R(0), B_R(0)\} = \{0.1, 0.9\}$  (a) full range of relative population (b) enlargement of the shaded areas on (a)

172 This window of opportunity, where the clinical gains could be made, which we will term  $T_{gap}$ ,  
173 is the difference between  $T_{min}$  and  $T_{max}$ . This relationship allows us to compare  $T_{min}$  and  $T_{max}$   
174 using different parameters.

$$T_{gap}(\{s_1, r_1, g_1\}, \{s_2, r_2\}) := T_{max}(\{s_1, r_1, g_1\}, (\mathcal{R}/\mathcal{S})_0) - T_{min}(\{s_1, r_1, g_1\}, \{s_2, r_2\}, (\mathcal{R}/\mathcal{S})_0)$$

$$= \frac{\ln \left[ \frac{(g_1 - s_1)(r_1 - s_1)(r_1 - s_2)}{r_1((r_1 - s_1)(r_2 - s_1) + g_1(r_1 + r_2 - s_1 - s_2))} \right]}{g_1 + r_1 - s_1} \quad (7)$$

175 We analyze sensitivity of  $T_{gap}$  over a reasonable space of non-dimensionalized drug parameters in  
176 Appendix B. As expected, as the proliferation rates under the second drug increases ( $r_2 \uparrow$  and/or  
177  $s_2 \uparrow$ ), the optimal time to switch to the second drug is delayed ( $T_{min} \uparrow$  and  $T_{gap} \downarrow$ ). As  $r_1$  increases,  
178 both  $T_{min}$  and  $T_{max}$  decrease. However,  $T_{max}$  decreases more than  $T_{min}$  does, so overall  $T_{gap}$   
179 decreases.  $s_1$  and  $T_{gap}$  do not have a monotonic relationship. As  $s_1$  increases,  $T_{gap}$  increases for a  
180 while (when  $s_1$  is relatively low), and then decreases afterward (when  $s_1$  is relatively high).

### 181 3.2 Population makeup and drug effect

182 In the previous section, the derived time points ( $T_{min}, T_{max}$ ) are dependent on the initial population  
183 makeup ( $(\mathcal{R}/\mathcal{S})_0$ ) from Equations (4)-(5), but not on explicit size of the total population or subpop-  
184 ulations. This makes sense, since absolute population size plays a role by scaling overall behavior  
185 of populations ( $C_P(t|\{s, r, g\}, \{C_S^0, C_R^0\}) = C_S^0 C_P(t|\{s, r, g\}, \{1, (\mathcal{R}/\mathcal{S})_0\})$  from (2)), and  $T_{min}$   
186 and  $T_{max}$  are both defined by derivatives at the time points (i.e.,  $C_P(T_{max}) = 0$ , and from (5)). In



187 this section, we seek to clarify the relationships between population makeup and therapy effects  
 188 defined using  $C'_P(t)$ , and roles of  $T_{min}$  and  $T_{max}$  in these relationships. We first define functions of  
 189 the ratio between the two cell subpopulations:

$$\mathcal{R}/\mathcal{S}(t) := \frac{C_R(t)}{C_S(t)}.$$

190 We further define functions measuring drug effectiveness as the relative rate of population change  
 191 depending only on  $\mathcal{R}/\mathcal{S}$  and drug parameters:

$$\frac{dC_P/dt}{C_P} = \frac{s C_S + r C_R}{C_S + C_R} = \frac{s + r (\mathcal{R}/\mathcal{S})}{1 + \mathcal{R}/\mathcal{S}} := Ef(\mathcal{R}/\mathcal{S}|\{s, r\}). \quad (8)$$

192  
 193  
 194 In the case where we classify cells as  $A_R$  and  $B_R$ , we similarly define their population makeup  
 195 as:

$$\mathcal{A}/\mathcal{B}(t) := \frac{A_R(t)}{B_R(t)}.$$

196 Then  $\mathcal{A}/\mathcal{B}$  at  $T_{min}$ , using a *DrugA*-to-*DrugB* switch ( $T_{min}^A$ ), and  $\mathcal{A}/\mathcal{B}$ , using a *DrugB*-to-*DrugA*  
 197 switch ( $T_{min}^B$ ), are equivalent:

$$\mathcal{A}/\mathcal{B}(T_{min}^A) = \mathcal{A}/\mathcal{B}(T_{min}^B) = \frac{r_B - s_A}{r_A - s_B} := (\mathcal{A}/\mathcal{B})^*. \quad (9)$$

198 At  $T_{max}$  with *DrugA* ( $T_{max}^A$ ), and with *DrugB* ( $T_{max}^B$ ), we have

$$\mathcal{A}/\mathcal{B}(T_{max}^A) = \frac{-s_A}{r_A} \quad \text{and} \quad \mathcal{A}/\mathcal{B}(T_{max}^B) = \frac{r_B}{-s_B}, \quad (10)$$

199 and further, as  $s < 0$  and  $r > 0$ , values of  $\mathcal{A}/\mathcal{B}$  are all positive. We give a more thorough description  
 200 of (9) and (10) in Appendix A.1.

201 The effects of *DrugA* (specified by  $p_A$ ) and *DrugB* (specified by  $p_B$ ), both defined by (8),  
 202 are equivalent at  $T_{min}$ , that is  $Ef((\mathcal{A}/\mathcal{B})^*|p_A) = Ef(1/(\mathcal{A}/\mathcal{B})^*|p_B)$ . The effect of *DrugA* is  
 203 larger if  $\mathcal{A}/\mathcal{B}(t) < (\mathcal{A}/\mathcal{B})^*$ , since the *DrugA* resistant cell population is relatively smaller than  
 204 the population of the other cell type, otherwise, *DrugB* has a more beneficial effect. When  $t =$   
 205  $T_{max}^A$ , and therefore when  $\mathcal{A}/\mathcal{B}(t) = -s_A/r_A$ , *DrugA* has no effect on population reduction (i.e.  
 206  $Ef(-s_A/r_A|p_A) = 0$ ). If  $\mathcal{A}/\mathcal{B}$  is getting smaller, *DrugA* becomes effective. Furthermore, the  
 207 smaller  $\mathcal{A}/\mathcal{B}$  is, the better the effect *DrugA* has. Similarly the effect of Drug B is zero when  
 208  $t = T_{max}^B$  and  $\mathcal{A}/\mathcal{B}(t) = -r_B/s_B$  and increases as  $\mathcal{A}/\mathcal{B}$  increases above it (see Figure 8).

209 The population makeup changes in the opposite direction as *DrugA* (or *DrugB*) therapy con-  
 210 tinues,  $\mathcal{A}/\mathcal{B}$  therefore continues to increase (or decrease). Therefore, if *DrugA* (or *DrugB*) is  
 211 given too long, it goes through a period of no or almost no effect around  $\mathcal{A}/\mathcal{B} = -s_A/r_A$  (or  
 212 around  $\mathcal{A}/\mathcal{B} = -r_B/s_B$ ), but once the drug is switched after that, there will be a higher therapy  
 213 effect with *DrugB* (or with *DrugA*). These two opposite aspects are balanced by switching the  
 214 drug when the population makeup reaches  $(\mathcal{A}/\mathcal{B})^*$ , which is applied to the optimal therapy regimen  
 215 described in the next section.

216 Depending on condition (6), the order of the three population makeups at  $T_{min}$ ,  $T_{min}^A$  and  $T_{max}^B$   
 217 changes. In particular, if  $r_A r_B < s_A s_B$ , there exists an interval  $(-r_B/s_B, -s_A/r_A)$  in  $\mathcal{A}/\mathcal{B}$  in  
 218 which both drugs are effective in decreasing the population size. Otherwise, if  $r_A r_B > s_A s_B$ , no  
 219 drug is effective when  $\mathcal{A}/\mathcal{B} \in (-s_A/r_A, -r_B/s_B)$ . These results are illustrated in Figure 8.

220

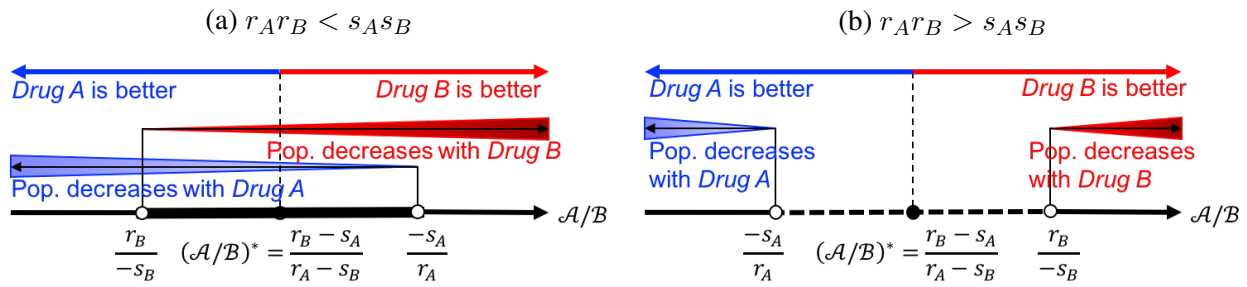

Figure 8: **Effect of Drug A and Drug B over the axis of  $A/B$ .** The two drugs have the same effect when  $A/B = (A/B)^*$ , and have no effect when  $A/B = -s_A/r_A$  (in the case of Drug A) or  $A/B = -r_B/s_B$  (in the case of Drug B). The drug effect increases as  $A/B$  gets farther from the no-effect level in the direction a smaller resistant subpopulation. Depending on a condition, there exists (Panel a) or does not exist (Panel b) a range of  $A/B$  in which both drugs have positive effects.

### 221 3.3 Optimal scheduling and its clinical implementation

222 In this section, we describe a drug-switching schedule design to achieve the best effect possible  
 223 with a pair of collaterally sensitive drugs. The area under the curve of the total population simulated  
 224 under an assigned treatment strategy is utilized to measure the aggregate effect of the strategy. The  
 225 smaller the area, the better the corresponding strategy. The numerically determined optimal strategy  
 226 consists of two stages:

- 227 • **Stage 1:** Treat with first drug until reaching the population makeup where the effects of each  
 228 drug are balanced  $((A/B)^*)$ , that is until the  $T_{min}$  of the first drug.
- 229 • **Stage 2:** Begin switching drugs with a specific temporal ratio (represented by  $k$  or  $k'$ , see  
 230 Figure 9) determining the difference in the treatment duration of each drug, and switching  
 231 frequently (represented by  $\Delta t \approx 0$ ). Both conditions are used to keep  $A/B$  close to constant  
 232 near  $(A/B)^*$ .

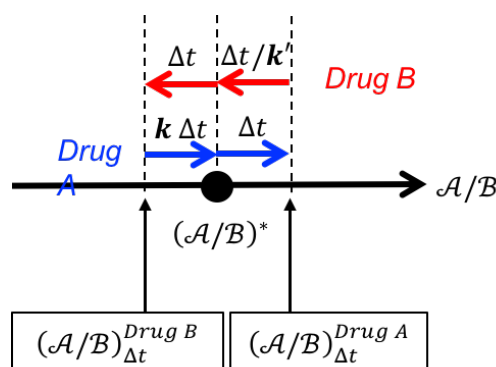

Figure 9: **Schematic of the relationship between therapy duration ( $\Delta t$ ,  $k\Delta t$ , or  $\Delta t/k'$ ) and the change in  $A/B$  around  $(A/B)^*$ .**  $\Delta t$  represents an arbitrary time interval (ideally short,  $\Delta t \approx 0$ ) and  $k$  represents a specific quantity corresponding to  $\Delta t$  and the model parameters in Drug A and Drug B.

233 We represent the relative durations of Drug A compared to the duration of Drug B in Stage  
 234 2 by  $k$  and  $k'$ . The explicit formulation of  $k$  can be derived from the solution of the differential

235 equations (2). To do so we (i) evaluate the level of  $\mathcal{A}/\mathcal{B}$  after  $\Delta t$  time has passed during *DrugA*  
 236 therapy, when starting with  $\mathcal{A}/\mathcal{B}(0) = (\mathcal{A}/\mathcal{B})^*$ , that is  $(\mathcal{A}/\mathcal{B})_{\Delta t}^{DrugA}$ , and then (ii) by measuring the  
 237 time period taken to regain  $(\mathcal{A}/\mathcal{B})^*$  from  $(\mathcal{A}/\mathcal{B})_{\Delta t}^{DrugA}$  through therapy with *DrugB*, denoted by  
 238  $\Delta t'$ , and finally (iii) taking the ratio between the two therapy periods, which is  $k := \Delta t/\Delta t'$ .  $k$   
 239 depends on the frequency of drug switching and model parameters:

$$k = k(\Delta t, p_A, p_B). \quad (11)$$

240 This  $k$  is consistent with  $k' = k'(\Delta t, p_A, p_B)$ , which is the ratio similarly evaluated with *DrugB*  
 241 as the first therapy and *DrugA* as the follow-up therapy, in the optimal case of instantaneous  
 242 switching:

$$\begin{aligned} \lim_{\Delta t \rightarrow 0} k(\Delta t, p_A, p_B) &= \lim_{\Delta t \rightarrow 0} k'(\Delta t, p_A, p_B) \\ &= \frac{(r_A - s_B)((r_A - s_A)(r_B - s_A) + g_A(r_A + r_B - s_A - s_B))}{(r_B - s_A)((r_B - s_B)(r_A - s_B) + g_B(r_A + r_B - s_A - s_B))} := k^*(p_A, p_B). \end{aligned} \quad (12)$$

243 For a more detailed derivation of  $k^*$ , see Appendix A.1. We further studied how sensitive  $k^*$  (or  
 244  $f^* = k^*/(1 + k^*)$ ) is over a reasonable range of non-dimensionalized  $\{p_A, p_B\}$  (see Appendix B  
 245 for details).  $k^*$  (or  $f^*$ ) increases, as  $r_A$  and/or  $s_B$  decreases as  $s_A$  and/or  $r_B$  increases.

246 Figure 10 shows examples of population curves with the optimal strategy ( $T_{min}$  switch) and  
 247 one non-optimal strategy ( $T_{max}$  switch) using the same choice of parameters/conditions. Visual  
 248 comparison of total population curves (Figure 10 (a)) reveals that the predicted optimal strategy  
 249 outperforms the intuitive strategy. To quantitatively compare the efficacy of each strategy, we can  
 250 use area between the two population curves. This area is:

$$\begin{aligned} \int_0^x [A_R(t | T_{max}\text{-switch}) + B_R(t | T_{max}\text{-switch}) \\ - A_R(t | T_{min}\text{-switch}) - B_R(t | T_{min}\text{-switch})] dt. \end{aligned} \quad (13)$$

251 With a choice of upper limit large enough to include most treatment schedules,  $x = 100$  (days),  
 252 we used sensitivity analysis of the integral (13) (See Appendix B for the details). The advantage  
 253 of the optimal treatment strategy is demonstrated by the lower population sizes in all cases. And  
 254 the evaluations of the areas under the population curves from  $t = 0$  to a range at the upper limit  
 255 of integration (Figure 10 (b)) confirms the superior effect of the optimal strategy over time. Figure  
 256 10 (c) shows the typical pattern of  $\mathcal{A}/\mathcal{B}$  in the optimal therapy compared to the other, which is  
 257 monotonically changing toward  $(\mathcal{A}/\mathcal{B})^*$  in the first stage and constant in the second stage.

258 While our theory predicts optimality with “instantaneous drug switching”, we realize this is not  
 259 clinically feasible. Therefore, the instantaneous drug switching in Stage 2 could be approximated  
 260 by a high frequency switching strategy with  $\Delta t \gtrsim 0$  along with the corresponding  $k(\Delta t)$  from (11),  
 261 or  $k^*$  (12) independent from  $\Delta t$ . As expected, the smaller  $\Delta t$  is chosen, the closer the population  
 262 follows the ideal case with  $\Delta t = 0$  (see Appendix C for the details), but improvements can still be  
 263 made over non-strategic switching, if the temporal ratio is followed.

264 We have proved that the effect of instantaneous drug switching, with an arbitrary ratio in du-  
 265 ration between two drugs ( $k$ ), is consistent with the effect of a mixed drug with a relative dosage  
 266 ratio, which is also  $k$  (Theorem A.8 in Appendix A.2). The theorem is used in the derivation of a  
 267 differential system/solution of the optimal strategy (Theorem A.11 in Appendix A.3). According  
 268 to these results, in Stage 2 of optimal regimen, all types of populations,  $A_R$ ,  $B_R$  and  $A_R + B_R$ ,  
 269 change with the same constant proliferation rate:

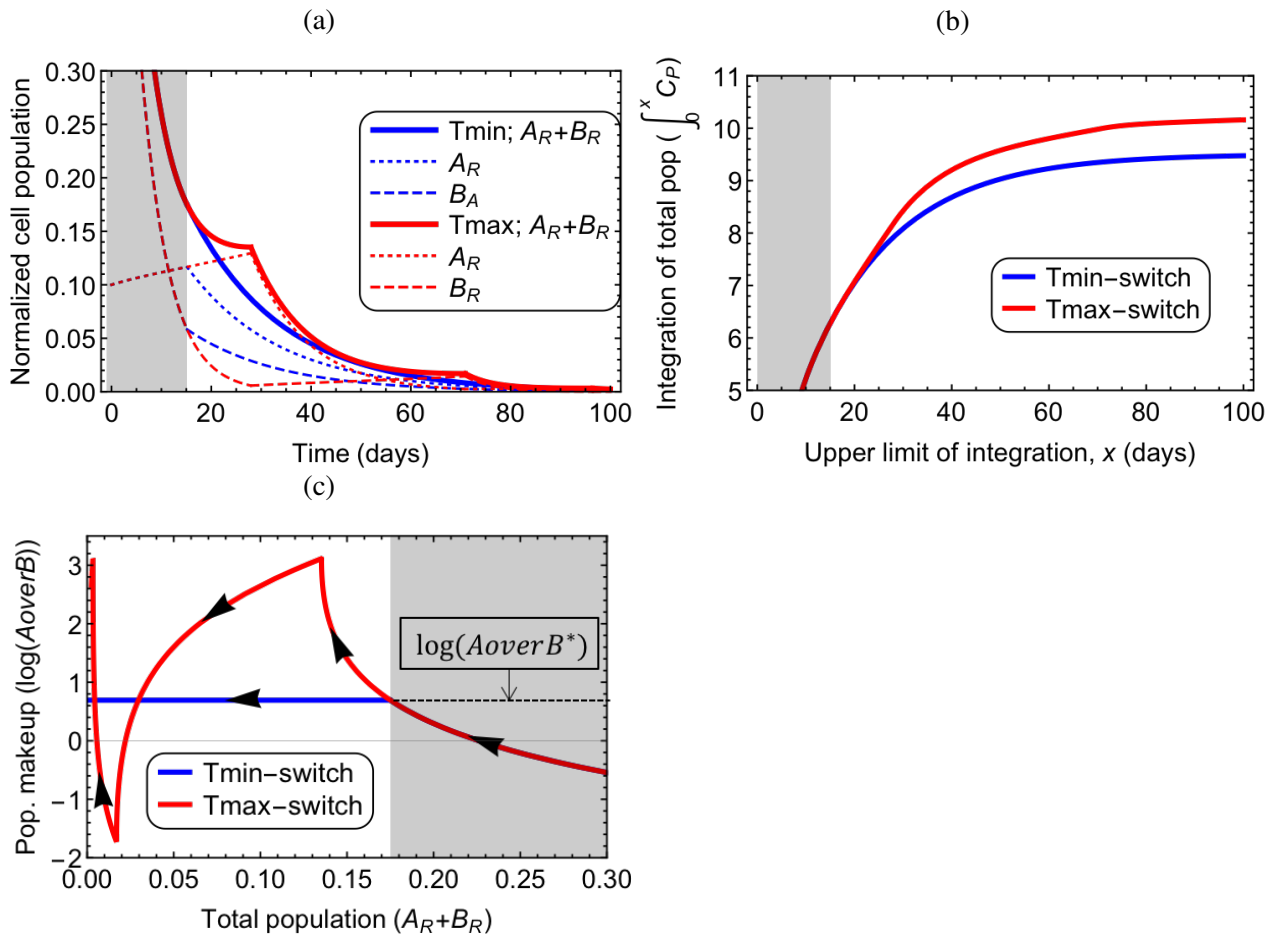

Figure 10: Comparison between dynamical trajectories using the optimal ( $T_{min}$  switch; blue curves) and an example of non-optimal ( $T_{max}$  switch; red curves) therapeutic strategies, in terms of (a) time histories of  $A_R$ ,  $B_R$  and  $A_R + B_R$ , (b) integration of total population from  $t = 0$  to varying upper limit ( $x$ -axis), and (c) dynamical changes in the total population and population makeup. On all panels, Stage 1 is shown in gray and Stage 2 is shown in white. Parameters/conditions are:  $\{s_A, s_B\} = \{-0.18, -0.09\}$ /day,  $\{r_A, r_B\} = \{0.008, 0.016\}$ /day,  $\{g_A, g_B\} = \{0.00075, 0.00125\}$ /day and  $\{A_R^0, B_R^0\} = \{0.1, 0.9\}$ .

270

$$\lambda = \frac{r_A r_B - s_A s_B}{r_A + r_B - s_A - s_B}.$$

271 While not clinical proof, these theoretical results suggest a method of application of two drugs in  
 272 sequence, which would approximate multi-drug therapy in efficacy, but which could be free of the  
 273 increase in side effects from the combination.

## 274 4 Studying extinction time with a stochastic formulation

275 In the previous sections we utilized an entirely deterministic model of heterogeneous tumor growth.  
 276 Cancers, however, are not deterministic, and without stochasticity in our system we could not model  
 277 an important part of cancer treatment: extinction. We therefore constructed a simple individual  
 278 based model using a Gillespie algorithm [32] to study this critical aspect of therapy that is not  
 279 limited by the assumptions we were required to make for purposes of analytic tractability.

280 Our stochastic model depends not only on net proliferation rates ( $s$ ,  $r$ , see Equation (1)) but

281 also on the combination of birth rates ( $b_S, b_R$ ) and death rates ( $d_S, d_R$ ) where  $s = b_S - d_S$  and  $r =$   
 282  $b_R - d_R$ . These five parameters ( $b_s, b_r, d_s, d_r, g$ ) govern the probabilities of events occurring. The  
 283 time at which one of these events occurs is determined by an exponential probability distribution,  
 284 and we represent the algorithm as pseudo-code thus:

285 **(Step 1)** Initialize  $\{S(0), R(0)\} = \{C_S^0, C_R^0\}$ .

286

287 **(Step 2)** Update from  $t$  to  $t + dt$ :

288 (random number generation)

289  $rt \sim U[0, 1], re \sim U[0, 1]$

290  $a = (b_S + d_S + g)S(t) + (b_R + d_R)R(t)$

291  $dt = -\log(rt)/a$

292  $\{p1, p2, p3, p4, p5\} = \{b_S S(t), d_S S(t), b_R R(t), d_R R(t), g S(t)\}/a$

293

294 if  $re < p1$ , then  $S(t + dt) = S(t) + 1$

295 else if  $re < p2 + p1$ , then  $S(t + dt) = S(t) - 1$

296 else if  $re < p3 + p2 + p1$ , then  $R(t + dt) = R(t) + 1$

297 else if  $re < p4 + p3 + p2 + p1$ , then  $R(t + dt) = R(t) - 1$

298 else,  $S(t + dt) = S(t) - 1$  and  $R(t + dt) = R(t) + 1$

299

300 **(Step 3)**  $t \leftarrow t + dt$  and repeat **(Step 2)** until a set time has passed or extinction has occurred.

301

302 We expanded the stochastic process for a single drug to treatment with two drugs being switched  
 303 in turn, as in our ODE system (See Appendix D, for the details of the computational code). Figure  
 304 11 (a) shows the consistency between the mean field behavior of the stochastic model and the ODE  
 305 system.

306 Despite the generally similar patterns of population curves simulated with same  $\{s, r, g\}$ -type  
 307 parameters and initial conditions, we observe differences in terms of elimination time if birth/death  
 308 combinations are different. To quantify these differences we directly studied the elimination times  
 309 (defined as the distribution of times to the absorbing state of total population = 0) simulated with  
 310 different combinations of birth/death rates, with a choice of fixed proliferation rates (as well as  
 311 other fixed transition rates and initial condition). We defined an index to represent different levels  
 312 of birth and death rate combinations:

$$313 \quad I_{stoch} = b_{I,J} + d_{I,J} \quad \text{for } I \in \{S, R\} \text{ and } J \in \{A, B\}$$

314 where  $I$  indicates a type of sensitivity or resistance and  $J$  does a type of drug. Given a specific net  
 315 proliferation rate ( $b_{I,J} - d_{I,J}$ ), the larger the index, the larger both birth ( $b_{I,J}$ ) and death ( $d_{I,J}$ ) rates  
 316 are.

317 Increased  $I_{stoch}$  result in larger fluctuations, these fluctuations then increase the probability of  
 318 reaching the absorbing state which is extinction (tumor cure). The relationship between  $I_{stoch}$  and  
 319 extinction time is shown in Figure 11 (b). The relationship is approximated by a linear model  
 320 with slope, -93.68 (days<sup>2</sup>), p-value of the slope,  $p < 0.05$ , and squared residual of regression,  
 321  $r^2 = 0.1726$ .

## 322 5 Conclusions and discussion

323 The emergence of resistance to the best current cancer therapies is an almost universal clinical  
 324 problem, and the solution to this represents one of the greatest unmet needs in oncology. While

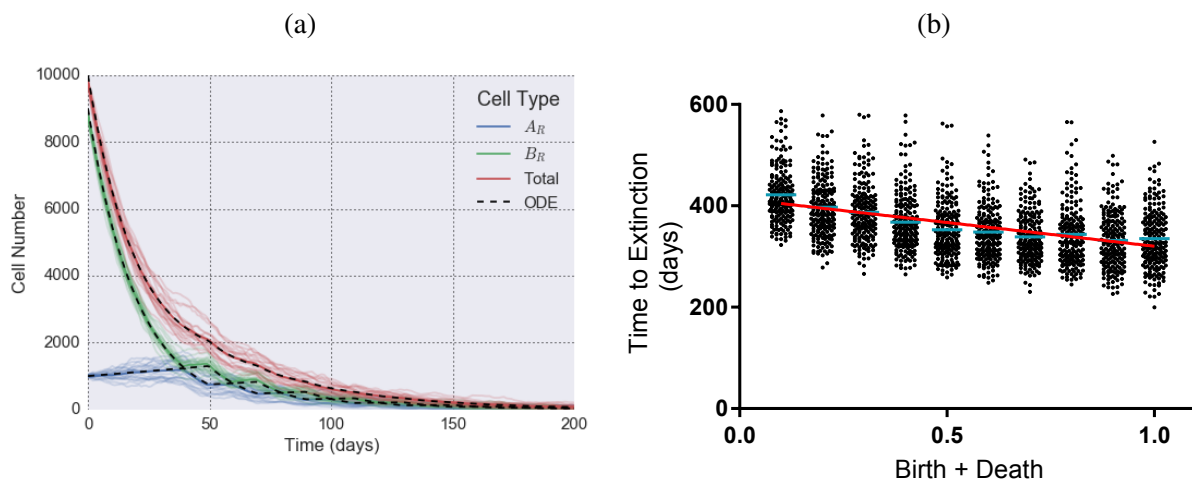

Figure 11: (a) Comparison between the stochastic process and the ODE model. The mean (thick curves) of multiple stochastic simulations (thin curves) are compared to the ODE solution (dashed curves). Parameters are  $\{s_A, r_A, g_A | s_B, r_B, g_B | A_R^0, B_R^0\} = \{-0.05, 0.005, 0.0001 | -0.05, 0.005, 0.0001 | 1000, 9000\}$ , birth rate + death rate ( $I_{stoch}$ ) = 1.0. (b) Relationship between birth-death combinations ( $I_{stoch}$ ; 0.1 to 1.0 with intervals of 0.1) and simulated extinction time in 200 replicates with the same parameters and initial condition with (a). Regression (red line) is  $y = -93.68x + \alpha$  (slope has  $p < 0.05$  and  $r^2 = 0.1726$ ). Cyan lines show mean values.

325 much effort has been put into novel drug discovery to combat this, there is also a growing interest  
 326 in determining the optimal sequences, or cycles of drugs that promote collateral sensitivity. To  
 327 study this second paradigm, we proposed a simple dynamical systems model of tumor evolution in  
 328 a heterogeneous tumor composed of two cell phenotypes. While in reality, cell phenotype can be  
 329 defined in many ways, here we completely describe it by considering only sensitivity (or resistance)  
 330 to a pair of collaterally sensitive drugs, which is encoded in their differential growth rates in specific  
 331 conditions. While the resulting mathematical model conveys only simple, but essential, features of  
 332 cell population dynamics, it does yield analytical solutions that more complex models cannot.

333 Our original motivation was to consider more complicated sequences, or cycles of drug therapy,  
 334 however, the model presented herein is difficult to apply for an expanded system of more than two  
 335 drugs. On the other hand, the cell classification used by others [18, 19, 28, 29, 33] considers  
 336 sensitivity and resistance independently, or even specifically to a given, abstracted, genotype [34,  
 337 35]. Therefore, in the case of 2 drugs, there are  $2^2 = 4$  groups, (i) sensitive to both drugs, (ii) and  
 338 (iii) resistant to only one drug, and (iv) resistant to both drugs. This formulation could be expanded  
 339 and applied to more than two drugs [18, 33]. Also, in other earlier researches, cell populations  
 340 are divided by more specific criteria for the choices of cancers and drugs (e.g., level of protein  
 341 expression, enzyme inhibitors, or growth factors [10, 11, 8]). We will consider both of the general  
 342 and specific approaches of population classification in future work.

343 The simplicity of our exponential growth/decay model arises from the assumption of a constant  
 344 growth rate. Use of exponential growth is likely not overly inappropriate, as we are most  
 345 interested in the development of resistance – and resistance is typically thought to begin when the  
 346 tumor burden is much smaller than the carrying capacity. However, the assumption might have  
 347 oversimplified patterns of cell growth, which is assumed to be non-exponential by others (e.g. lo-  
 348 gistic growth [31, 36, 37]), due to the limited space and resources of the human body for tumor  
 349 growth, as well as increasing levels of resistance (increasing growth rates) in the face of continued  
 350 selective pressure [38]. We will consider the concept of changing growth rates in terms of time and

351 population density, and explore its effect on our analytical results (such as  $T_{gap}$ ,  $(A/B)^*$ ,  $k^*$  and  
352 etc.) in future work.

353 We provided a strategy for drug-switching which yields the best possible effect in this model  
354 system, i.e. the fastest decrease in cell population. The strategy is defined explicitly in terms of  
355 parameters determined by the drugs that are used, therefore the applicability of our model relies  
356 on the availability of drug parameters. Drug parameters for several drugs are known based on *in*  
357 *vitro* experiment or clinical studies [39, 40]. However, these parameters are not available for all  
358 drugs, and even the usefulness of *in vitro* results may change from one patient to the next. Because  
359 of this, we propose focusing our future work on learning to parameterize models of this type from  
360 individual patient response data. Examples of parameterizing patient response from imaging [41]  
361 as well as blood based markers [42] already exist, suggesting this is a reasonable goal in the near  
362 future.

363 In our optimized treatment regimen we must first apply *DrugA* (if *DrugA* is better at the ini-  
364 tial time, i.e.,  $A/B(0) < (A/B)^*$ ; see Figure 8). Surprisingly the ideal treatment course switches  
365 to *DrugB* while *DrugA* is still effective at reducing the total population. Since treatment should  
366 ideally switch before the tumor relapses our study justifies the search for techniques that either  
367 identify or predict resistance mechanisms early. Our study also argues against the opposite ex-  
368 treme, wherein resistant cells are targeted at the beginning of treatment. The preponderance of  
369 cells sensitive to the standard of care makes this treatment initially ideal, and does not preclude  
370 eventual success in our model. Further, the rapid tumor size reduction, associated with targeting  
371 the larger sensitive population first, could be clinically meaningful.

372 Our stochastic model allowed us to explore the contributions of cell birth and death separately,  
373 as opposed to the ODE which could only consider the net growth rate. These parameters can be  
374 altered in cancer since cancer treatments have various cytostatic and cytotoxic effects, and therefore  
375 different treatments can have different effects on death and birth. In our model, increasing the total  
376 birth and death rate (as opposed to the net growth rate) caused, on average, extinction earlier in time  
377 (Figure 11 (b)). This can be explained by the fact that extinction is the only absorbing state in our  
378 model, and therefore higher death rates determine when extinction occurs, even when birth rates  
379 are also higher. Our stochastic model therefore suggests that highly cytotoxic drugs (even those  
380 with correspondingly minimal cytostatic effects) are more effective at eliminating tumors, at least  
381 when the tumor population is small.

382 In summary, we have presented a simple model of a heterogeneous, two phenotype tumor, with  
383 evolution occurring between resistant and sensitive states. We derive exact analytic solutions for  
384 tumor response in temporally changing drug conditions and find an optimal regimen which involves  
385 drug switching after a specific, critical time point which occurs before resistance would normally be  
386 clinically evident. While our model is highly simplified, we have identified several opportunities to  
387 improve our understanding and treatment of drug resistance, and also future opportunities for new  
388 modeling endeavors.

## 389 References

- 390 [1] C. Holohan, S. Van Schaeybroeck, D. B. Longley, and P. G. Johnston, “Cancer drug resistance:  
391 an evolving paradigm,” *Nature reviews. Cancer*, vol. 13, no. 10, p. 714, 2013.
- 392 [2] R. J. Gillies, D. Verduzco, and R. A. Gatenby, “Evolutionary dynamics unifies carcinogenesis  
393 and cancer therapy,” *Nature reviews. Cancer*, vol. 12, no. 7, p. 487, 2012.

- 394 [3] F. A. Monzon, S. Ogino, M. E. H. Hammond, K. C. Halling, K. J. Bloom, and M. N. Niki-  
395 forova, “The role of kras mutation testing in the management of patients with metastatic  
396 colorectal cancer,” *Archives of pathology & laboratory medicine*, vol. 133, no. 10, pp. 1600–  
397 1606, 2009.
- 398 [4] J. M. Legler, E. J. Feuer, A. L. Potosky, R. M. Merrill, and B. S. Kramer, “The role of prostate-  
399 specific antigen (psa) testing patterns in the recent prostate cancer incidence decline in the  
400 united states,” *Cancer Causes & Control*, vol. 9, no. 5, pp. 519–527, 1998.
- 401 [5] A. Marusyk, V. Almendro, and K. Polyak, “Intra-tumour heterogeneity: a looking glass for  
402 cancer?,” *Nature Reviews Cancer*, vol. 12, no. 5, p. 323, 2012.
- 403 [6] N. Amirouchene-Angelozzi, C. Swanton, and A. Bardelli, “Tumor evolution as a therapeutic  
404 target,” *Cancer Discovery*, vol. 7, no. 8, pp. 805–817, 2017.
- 405 [7] A. Thomas, S. El Rouby, J. C. Reed, S. Krajewski, R. Silber, M. Potmesil, and E. W. New-  
406 comb, “Drug-induced apoptosis in b-cell chronic lymphocytic leukemia: relationship between  
407 p53 gene mutation and bcl-2/bax proteins in drug resistance,” *Oncogene*, vol. 12, no. 5,  
408 pp. 1055–1062, 1996.
- 409 [8] V. D. Jonsson, C. M. Blakely, L. Lin, S. Asthana, N. Matni, V. Olivas, E. Pazarentzos, M. A.  
410 Gubens, B. C. Bastian, B. S. Taylor, *et al.*, “Novel computational method for predicting poly-  
411 therapy switching strategies to overcome tumor heterogeneity and evolution,” *Scientific re-  
412 ports*, vol. 7, 2017.
- 413 [9] C. Scheel and R. A. Weinberg, “Phenotypic plasticity and epithelial-mesenchymal transitions  
414 in cancer and normal stem cells?,” *International journal of cancer*, vol. 129, no. 10, pp. 2310–  
415 2314, 2011.
- 416 [10] A. Kaznatcheev, R. Vander Velde, J. G. Scott, and D. Basanta, “Cancer treatment scheduling  
417 and dynamic heterogeneity in social dilemmas of tumour acidity and vasculature,” *British  
418 journal of cancer*, vol. 116, no. 6, p. 785, 2017.
- 419 [11] A. O. Pisco, A. Brock, J. Zhou, A. Moor, M. Mojtahedi, D. Jackson, and S. Huang, “Non-  
420 darwinian dynamics in therapy-induced cancer drug resistance,” *Nature communications*,  
421 vol. 4, p. 2467, 2013.
- 422 [12] A. C. Palmer and P. K. Sorger, “Combination cancer therapy can confer benefit via patient-to-  
423 patient variability without drug additivity or synergy,” *Cell*, vol. 171, no. 7, pp. 1678–1691,  
424 2017.
- 425 [13] D. J. Hutchison, “Cross resistance and collateral sensitivity studies in cancer chemotherapy,”  
426 *Advances in cancer research*, vol. 7, pp. 235–350, 1963.
- 427 [14] A. Dhawan, D. Nichol, F. Kinose, M. E. Abazeed, A. Marusyk, E. B. Haura, and J. G. Scott,  
428 “Collateral sensitivity networks reveal evolutionary instability and novel treatment strategies  
429 in ALK mutated non-small cell lung cancer,” *Scientific Reports*, vol. 7, 2017.
- 430 [15] L. Imamovic and M. O. Sommer, “Use of collateral sensitivity networks to design drug cycling  
431 protocols that avoid resistance development,” *Science translational medicine*, vol. 5, no. 204,  
432 pp. 204ra132–204ra132, 2013.



- 433 [16] B. Zhao, J. C. Sedlak, R. Srinivas, P. Creixell, J. R. Pritchard, B. Tidor, D. A. Lauffenburger,  
434 and M. T. Hemann, “Exploiting temporal collateral sensitivity in tumor clonal evolution,”  
435 *Cell*, vol. 165, no. 1, pp. 234–246, 2016.
- 436 [17] D. Nichol, J. Rutter, C. Bryant, P. Jeavons, A. Anderson, R. Bonomo, and J. Scott, “Collateral  
437 sensitivity is contingent on the repeatability of evolution,” *bioRxiv*, p. 185892, 2017.
- 438 [18] C. Tomasetti and D. Levy, “An elementary approach to modeling drug resistance in cancer,”  
439 *Mathematical biosciences and engineering: MBE*, vol. 7, no. 4, p. 905, 2010.
- 440 [19] J. Goldie and A. Coldman, “Quantitative model for multiple levels of drug resistance in clinical  
441 tumors,” *Cancer treatment reports*, vol. 67, no. 10, pp. 923–931, 1983.
- 442 [20] N. L. Komarova and D. Wodarz, “Evolutionary dynamics of mutator phenotypes in cancer,”  
443 *Cancer Research*, vol. 63, no. 20, pp. 6635–6642, 2003.
- 444 [21] J. Goldie, “Rationale for the use of alternating non-cross-resistant chemotherapy,” *Cancer  
445 Treat Rep*, vol. 66, pp. 439–449, 1982.
- 446 [22] E. Gaffney, “The application of mathematical modelling to aspects of adjuvant chemotherapy  
447 scheduling,” *Journal of mathematical biology*, vol. 48, no. 4, pp. 375–422, 2004.
- 448 [23] E. Gaffney, “The mathematical modelling of adjuvant chemotherapy scheduling: incorporating  
449 the effects of protocol rest phases and pharmacokinetics,” *Bulletin of mathematical  
450 biology*, vol. 67, no. 3, pp. 563–611, 2005.
- 451 [24] E. A. Boston and E. A. Gaffney, “The influence of toxicity constraints in models of chemother-  
452 apeutic protocol escalation,” *Mathematical medicine and biology: a journal of the IMA*,  
453 vol. 28, no. 4, pp. 357–384, 2011.
- 454 [25] J. G. Scott, A. G. Fletcher, A. R. Anderson, and P. K. Maini, “Spatial metrics of tumour vas-  
455 cular organisation predict radiation efficacy in a computational model,” *PLoS computational  
456 biology*, vol. 12, no. 1, p. e1004712, 2016.
- 457 [26] K. A. Rejniak, “A single-cell approach in modeling the dynamics of tumor microregions,”  
458 *Math. Biosci. Eng*, vol. 2, no. 3, pp. 643–655, 2005.
- 459 [27] J.-H. Chen, Y.-H. Kuo, and H. P. Luh, “Optimal policies of non-cross-resistant chemotherapy  
460 on goldie and coldmans cancer model,” *Mathematical biosciences*, vol. 245, no. 2, pp. 282–  
461 298, 2013.
- 462 [28] A. A. Katouli and N. L. Komarova, “The worst drug rule revisited: mathematical modeling  
463 of cyclic cancer treatments,” *Bulletin of mathematical biology*, vol. 73, no. 3, pp. 549–584,  
464 2011.
- 465 [29] J. Goldie and A. Coldman, “A mathematic model for relating the drug sensitivity of tumors  
466 to their spontaneous mutation rate,” *Cancer treatment reports*, vol. 63, no. 11-12, pp. 1727–  
467 1733, 1979.
- 468 [30] A. Coldman and J. Goldie, “A model for the resistance of tumor cells to cancer chemothera-  
469 peutic agents,” *Mathematical Biosciences*, vol. 65, no. 2, pp. 291–307, 1983.
- 470 [31] P. Gerlee, “The model muddle: in search of tumor growth laws,” *Cancer research*, vol. 73,  
471 no. 8, pp. 2407–2411, 2013.

- 472 [32] D. T. Gillespie, “A general method for numerically simulating the stochastic time evolution of  
473 coupled chemical reactions,” *Journal of computational physics*, vol. 22, no. 4, pp. 403–434,  
474 1976.
- 475 [33] J. H. Goldie and A. J. Coldman, *Drug resistance in cancer: mechanisms and models*. Cam-  
476 bridge University Press, 2009.
- 477 [34] N. L. Komarova and D. Wodarz, “Drug resistance in cancer: principles of emergence and pre-  
478 vention,” *Proceedings of the National Academy of Sciences of the United States of America*,  
479 vol. 102, no. 27, pp. 9714–9719, 2005.
- 480 [35] D. Nichol, P. Jeavons, A. G. Fletcher, R. A. Bonomo, P. K. Maini, J. L. Paul, R. A. Gatenby,  
481 A. R. Anderson, and J. G. Scott, “Steering evolution with sequential therapy to prevent the  
482 emergence of bacterial antibiotic resistance,” *PLoS computational biology*, vol. 11, no. 9,  
483 p. e1004493, 2015.
- 484 [36] S. J. Berry, D. S. Coffey, P. C. Walsh, and L. L. Ewing, “The development of human benign  
485 prostatic hyperplasia with age,” *The Journal of urology*, vol. 132, no. 3, pp. 474–479, 1984.
- 486 [37] N. C. Atuegwu, L. R. Arlinghaus, X. Li, A. B. Chakravarthy, V. G. Abramson, M. E. Sanders,  
487 and T. E. Yankeelov, “Parameterizing the logistic model of tumor growth by dw-mri and  
488 dce-mri data to predict treatment response and changes in breast cancer cellularity during  
489 neoadjuvant chemotherapy,” *Translational oncology*, vol. 6, no. 3, pp. 256–264, 2013.
- 490 [38] J. Scott and A. Marusyk, “Somatic clonal evolution: A selection-centric perspective,”  
491 *Biochimica et Biophysica Acta (BBA)-Reviews on Cancer*, vol. 1867, no. 2, pp. 139–150,  
492 2017.
- 493 [39] T. L. Jackson and H. M. Byrne, “A mathematical model to study the effects of drug resistance  
494 and vasculature on the response of solid tumors to chemotherapy,” *Mathematical biosciences*,  
495 vol. 164, no. 1, pp. 17–38, 2000.
- 496 [40] W. H. Wilson, J. Teruya-Feldstein, T. Fest, C. Harris, S. M. Steinberg, E. S. Jaffe, and M. Raf-  
497 feld, “Relationship of p53, bcl-2, and tumor proliferation to clinical drug resistance in non-  
498 hodgkin9s lymphomas,” *Blood*, vol. 89, no. 2, pp. 601–609, 1997.
- 499 [41] K. R. Swanson, R. C. Rockne, J. Claridge, M. A. Chaplain, E. C. Alvord, and A. R. Anderson,  
500 “Quantifying the role of angiogenesis in malignant progression of gliomas: in silico modeling  
501 integrates imaging and histology,” *Cancer research*, vol. 71, no. 24, pp. 7366–7375, 2011.
- 502 [42] B. Werner, J. G. Scott, A. Sottoriva, A. R. Anderson, A. Traulsen, and P. M. Altrock, “The  
503 cancer stem cell fraction in hierarchically organized tumors can be estimated using mathe-  
504 matical modeling and patient-specific treatment trajectories,” *Cancer research*, vol. 76, no. 7,  
505 pp. 1705–1713, 2016.

## 506 **Appendix A Derivations of explicit expressions**

### 507 **A.1 Details of Equations (4), (5), (6), (7), (9), (10) and (12)**

- 508 1.  $T_{max}$ : Equation (4)

509

$T_{max}$  is a minimum point of  $C_p(t)$  (from (3)). Therefore,

$$\begin{aligned}
 C'_p(T_{max}) &= 0 \\
 \Leftrightarrow -(g-s) \left( \frac{r-s}{g+r-s} C_S^0 \right) e^{-(g-s) T_{max}} + r \left( \frac{g(C_S^0 + C_R^0) + (r-s) C_R^0}{g+r-s} \right) e^{r T_{max}} &= 0 \\
 \Leftrightarrow (g-s) \left( \frac{r-s}{g+r-s} C_S^0 \right) e^{-(g-s) T_{max}} &= r \left( \frac{g(C_S^0 + C_R^0) + (r-s) C_R^0}{g+r-s} \right) e^{r T_{max}} \\
 \Leftrightarrow (g-s)(r-s) C_S^0 e^{-(g-s) T_{max}} &= r ((g(C_S^0 + C_R^0) + (r-s) C_R^0)) e^{r T_{max}} \\
 \Leftrightarrow e^{(g+r-s) T_{max}} &= \frac{(g-s)(r-s) C_S^0}{r(g(C_S^0 + C_R^0) + (r-s) C_R^0)} \\
 \Leftrightarrow e^{(g+r-s) T_{max}} &= \frac{(g-s)(r-s)}{r(g((\mathcal{R}/\mathcal{S})_0 + 1) + (r-s)(\mathcal{R}/\mathcal{S})_0)} \\
 \Leftrightarrow T_{max} &= \frac{\ln \left[ \frac{(g-s)(r-s)}{r(g((\mathcal{R}/\mathcal{S})_0 + 1) + (r-s)(\mathcal{R}/\mathcal{S})_0)} \right]}{g+r-s}
 \end{aligned}$$

510 2.  $T_{min}$ : Equation (5)

511

512 Let us consider the case of drug switch with *DrugA* being the “pre-switch” drug and *DrugB*  
 513 being the “post-switch” drug. If, at a specific time point  $t_1$ , cell population is decreasing faster  
 514 by continuing *DrugA*-therapy than by changing drug to *DrugB*,

515 
$$C'_P(0 | p_A, \{B_R(t_1), A_R(t_1)\}) > C'_P(0 | p_B, \{A_R(t_1), B_R(t_1)\}),$$

516 from Equation (3) where 
$$\begin{pmatrix} B_R(t_1) \\ A_R(t_1) \end{pmatrix} = \begin{pmatrix} e^{-(g_A-s_A) t_1} & 0 \\ \frac{g_A (e^{r_A t_1} - e^{-(g_A-s_A) t_1}}{g_A + r_A - s_A} & e^{r_A t_1} \end{pmatrix} \begin{pmatrix} B_R(0) \\ A_R(0) \end{pmatrix}$$

517 evaluated from Equation (2). Then,

$$\begin{aligned}
& C'_P(0 | p_A, \{B_R(t_1), A_R(t_1)\}) > C'_P(0 | p_B, \{A_R(t_1), B_R(t_1)\}) \\
\Leftrightarrow & -(g_A - s_A) \left( \frac{r_A - s_A}{g_A + r_A - s_A} B_R(t_1) \right) + r_A \left( \frac{g_A (A_R(t_1) + B_R(t_1)) + (r_A - s_A) A_R(t_1)}{g_A + r_A - s_A} \right) \\
& > -(g_B - s_B) \left( \frac{r_B - s_B}{g_B + r_B - s_B} A_R(t_1) \right) + r_B \left( \frac{g_B (A_R(t_1) + B_R(t_1)) + (r_B - s_B) B_R(t_1)}{g_B + r_B - s_B} \right) \\
\Leftrightarrow & r_A A_R(t_1) + s_A B_R(t_1) > r_B B_R(t_1) + s_B A_R(t_1) \\
\Leftrightarrow & \frac{A_R(t_1)}{B_R(t_1)} > \frac{r_B - s_A}{r_A - s_B} \\
& \frac{g_A (e^{r_A t_1} - e^{-(g_A - s_A) t_1})}{g_A + r_A - s_A} B_R(0) + e^{r_A t_1} A_R(0) > \frac{r_B - s_A}{r_A - s_B} \\
\Leftrightarrow & \frac{g_A (e^{(g_A + r_A - s_A) t_1} - 1)}{g_A + r_A - s_A} + e^{(g_A + r_A - s_A) t_1} (\mathcal{A}/\mathcal{B})_0 > \frac{r_B - s_A}{r_A - s_B} \\
\Leftrightarrow & e^{(g_A + r_A - s_A) t_1} \left( \frac{g_A}{g_A + r_A - s_A} + (\mathcal{A}/\mathcal{B})_0 \right) > \frac{r_B - s_A}{r_A - s_B} + \frac{g_A}{g_A + r_A - s_A} \\
\Leftrightarrow & t_1 < \frac{\ln \left[ \frac{(r_A - s_A)(r_B - s_A) + g_A(r_A + r_B - s_A - s_B)}{(r_A - s_B)(g_A + (g_A + r_A - s_A)(\mathcal{A}/\mathcal{B})_0)} \right]}{g_A + r_A - s_A} \\
& (= T_{\min}(\{s_A, r_A, g_A\}, \{s_B, r_B\}, (\mathcal{A}/\mathcal{B})_0)).
\end{aligned}$$

518

519

Similarly,

520

$$t_1 > T_{\min}(\{s_A, r_A, g_A\}, \{s_B, r_B\}, (\mathcal{A}/\mathcal{B})_0),$$

521

iff the population is dropping faster using *DrugB* than by continuing to use *DrugA*, and

522

$$t_1 = T_{\min}(\{s_A, r_A, g_A\}, \{s_B, r_B\}, (\mathcal{A}/\mathcal{B})_0),$$

523

iff the population is dropping at an equal rate with either drug.

524

525

The general form of  $T_{\min}$  is

526

$$T_{\min}(\{s_1, r_1, g_1\}, \{s_2, r_2\}, (\mathcal{R}/\mathcal{S})_0) = \frac{\ln \left[ \frac{(r_1 - s_1)(r_2 - s_1) + g_1(r_1 + r_2 - s_1 - s_2)}{(r_1 - s_2)(g_1 + (g_1 + r_1 - s_1)(\mathcal{R}/\mathcal{S})_0)} \right]}{g_1 + r_1 - s_1},$$

527

528

529

where the parameters of “pre-switch” and “post-switch” drugs are  $\{s_1, r_1, g_1\}$  and  $\{s_2, r_2, g_2\}$  respectively, and initial population makeup,  $(\mathcal{R}/\mathcal{S})_0$ , is the resistant cell population divided by the sensitive cell population for the “pre-switch” drug.

3.  $T_{gap}$ : Equation (6) - (7)

$$\begin{aligned}
 T_{gap}(\{s_1, r_1, g_1\}, \{s_2, r_2\}) &= T_{max}(\{s_1, r_1, g_1\}, (\mathcal{R}/\mathcal{S})_0) - T_{min}(\{s_1, r_1, g_1\}, \{s_2, r_2\}, (\mathcal{R}/\mathcal{S})_0) \\
 &= \frac{\ln \left[ \frac{(g_1 - s_1)(r_1 - s_1)}{r_1(g((\mathcal{R}/\mathcal{S})_0 + 1) + (r_1 - s_1)(\mathcal{R}/\mathcal{S})_0)} \right]}{g_1 + r_1 - s_1} - \frac{\ln \left[ \frac{(r_1 - s_1)(r_2 - s_1) + g_1(r_1 + r_2 - s_1 - s_2)}{(r_1 - s_2)(g_1 + (g_1 + r_1 - s_1)(\mathcal{R}/\mathcal{S})_0)} \right]}{g_1 + r_1 - s_1} \\
 &= \frac{\ln \left[ \frac{(g_1 - s_1)(r_1 - s_1)}{r_1(g((\mathcal{R}/\mathcal{S})_0 + 1) + (r_1 - s_1)(\mathcal{R}/\mathcal{S})_0)} \frac{(r_1 - s_2)(g_1 + (g_1 + r_1 - s_1)(\mathcal{R}/\mathcal{S})_0)}{(r_1 - s_1)(r_2 - s_1) + g_1(r_1 + r_2 - s_1 - s_2)} \right]}{g_1 + r_1 - s_1} \\
 &= \frac{\ln \left[ \frac{(g_1 - s_1)(r_1 - s_1)(r_1 - s_2)}{r_1((r_1 - s_1)(r_2 - s_1) + g_1(r_1 + r_2 - s_1 - s_2))} \right]}{g_1 + r_1 - s_1}
 \end{aligned}$$

And,

$$\begin{aligned}
 &T_{min}(\{s_1, r_1, g_1\}, \{s_2, r_2\}, (\mathcal{R}/\mathcal{S})_0) < T_{max}(\{s_1, r_1, g_1\}, (\mathcal{R}/\mathcal{S})_0) \\
 &\Leftrightarrow T_{gap}(\{s_1, r_1, g_1\}, \{s_2, r_2\}) > 0 \\
 &\Leftrightarrow \frac{\ln \left[ \frac{(g_1 - s_1)(r_1 - s_1)(r_1 - s_2)}{r_1((r_1 - s_1)(r_2 - s_1) + g_1(r_1 + r_2 - s_1 - s_2))} \right]}{g_1 + r_1 - s_1} > 0 \\
 &\Leftrightarrow \ln \left[ \frac{(g_1 - s_1)(r_1 - s_1)(r_1 - s_2)}{r_1((r_1 - s_1)(r_2 - s_1) + g_1(r_1 + r_2 - s_1 - s_2))} \right] > 0 \\
 &\Leftrightarrow \frac{(g_1 - s_1)(r_1 - s_1)(r_1 - s_2)}{r_1((r_1 - s_1)(r_2 - s_1) + g_1(r_1 + r_2 - s_1 - s_2))} > 1 \\
 &\Leftrightarrow (g_1 - s_1)(r_1 - s_1)(r_1 - s_2) > r_1((r_1 - s_1)(r_2 - s_1) + g_1(r_1 + r_2 - s_1 - s_2)) \\
 &\Leftrightarrow g_1 s_1 s_2 - s_1^2 s_2 + r_1 s_1 s_2 > g_1 r_1 r_2 - s_1 r_1 r_2 + r_1^2 r_2 \\
 &\Leftrightarrow (g_1 + r_1 - s_1)(s_1 s_2 - r_1 r_2) > 0 \\
 &\Leftrightarrow r_1 r_2 - s_1 s_2 > 0 \quad \Leftrightarrow \quad r_1 r_2 < s_1 s_2
 \end{aligned}$$

530 Similarly  $T_{gap} = 0$  iff  $r_1 r_2 = s_1 s_2$ , and  $T_{gap} < 0$  iff  $r_1 r_2 > s_1 s_2$ .

531 4.  $\mathcal{A}/\mathcal{B}$  at  $T_{max}$  and  $T_{min}$ : Equation (9) - (10).

532

533 It is clear that

534 
$$\mathcal{A}/\mathcal{B}(T_{min}^A) = \mathcal{A}/\mathcal{B}(T_{min}^B) = \frac{r_B - s_A}{r_A - s_B},$$

535 and

536 
$$\mathcal{A}/\mathcal{B}(T_{max}^A) = \frac{-s_A}{r_A} \quad \text{and} \quad \mathcal{A}/\mathcal{B}(T_{max}^B) = \frac{r_B}{-s_B}$$

537 by the expressions of  $A_R(t)$ ,  $B_R(t)$ ,  $T_{max}$  and  $T_{min}$  from Equations (2), (5) and (4).

538

Otherwise, it can be proved more simply using the concept of  $T_{min}$  and  $T_{max}$ . Since  $C'_S(t) + C'_R(t) = s C_S(t) + r C_R(t)$ , from the differential system (1), the derivatives of  $A_R(t) + B_R(t)$  are  $s_A B_R(t) + r_A A_R(t)$  and  $s_B A_R(t) + r_B B_R(t)$  under *DrugA* and *DrugB* respectively. At  $T_{min}$  (whether it is  $T_{min}^A$  or  $T_{min}^B$ ) the derivatives of total populations are equivalent either under *DrugA* or under *DrugB*. Then,

$$\begin{aligned} s_A B_R(T_{min}) + r_A A_R(T_{min}) &= s_B A_R(T_{min}) + r_B B_R(T_{min}) \\ \frac{A_R(T_{min})}{B_R(T_{min})} &= \frac{r_B - s_A}{r_A - s_B} \\ \mathcal{A}/\mathcal{B}(T_{min}) &= \frac{r_B - s_A}{r_A - s_B} \end{aligned}$$

539 Therefore,

$$540 \quad \mathcal{A}/\mathcal{B}(T_{min}^A) = \mathcal{A}/\mathcal{B}(T_{min}^B) = \frac{r_B - s_A}{r_A - s_B},$$

Under *DrugA* at  $T_{max}^A$ ,  $A'_R(t) + B'_R(t) = 0$ . Therefore,

$$\begin{aligned} s_A B_R(T_{max}^A) + r_A A_R(T_{max}^A) &= 0 \\ \mathcal{A}/\mathcal{B}(T_{max}^A) &= \frac{-s_A}{r_A}. \end{aligned}$$

$$541 \quad \text{Similarly, } \mathcal{A}/\mathcal{B}(T_{max}^B) = \frac{r_B}{-s_B}.$$

### 542 5. $k^*$ : Equation (12)

543 The sizes of the subpopulations after  $\Delta t$ -long therapy with *DrugA* started from initial pop-  
544 ulation makeup of  $\mathcal{A}/\mathcal{B}(0) = (\mathcal{A}/\mathcal{B})^*$  are

$$545 \quad \begin{pmatrix} B_R(\Delta t) \\ A_R(\Delta t) \end{pmatrix} = \begin{pmatrix} e^{-(g_A - s_A) \Delta t} & 0 \\ \frac{g_A (e^{r_A \Delta t} - e^{-(g_A - s_A) \Delta t})}{g_A + r_A - s_A} & e^{r_A \Delta t} \end{pmatrix} \begin{pmatrix} K \\ K (\mathcal{A}/\mathcal{B})^* \end{pmatrix}$$

546 derived from Equation (2), with some constant  $K$  scaling population size. Then the popula-  
547 tion makeup at the  $\Delta t$  and its derivative in terms of  $\Delta t$  are

$$548 \quad (\mathcal{A}/\mathcal{B})_{\Delta t} := \frac{A_R(\Delta t)}{B_R(\Delta t)} = \frac{g_A (e^{(g_A + r_A - s_A) \Delta t} - 1)}{g_A + r_A - s_A} + e^{(g_A + r_A - s_A) \Delta t} (\mathcal{A}/\mathcal{B})^*$$

$$549 \quad \frac{d((\mathcal{A}/\mathcal{B})_{\Delta t})}{d(\Delta t)} = g_A e^{(g_A + r_A - s_A) \Delta t} + (g_A + r_A - s_A) e^{(g_A + r_A - s_A) \Delta t} (\mathcal{A}/\mathcal{B})^*$$

The time taken from  $t = \Delta t$  to reach back to the time of  $\mathcal{A}/\mathcal{B}(t) = (\mathcal{A}/\mathcal{B})^*$  given *DrugB* is

$$\begin{aligned} &T_{min}(\{s_B, r_B, g_B\}, \{s_A, r_A\}, 1/(\mathcal{A}/\mathcal{B})_{\Delta t}) \\ &= \frac{\ln \left[ \frac{(r_B - s_B)(r_A - s_B) + g_B(r_B + r_A - s_B - s_A)}{(r_B - s_A)(g_B + (g_B + r_B - s_B)/(\mathcal{A}/\mathcal{B})_{\Delta t})} \right]}{g_B + r_B - s_B} \end{aligned}$$

550 from Equation (5).

551

Then the relative ratio between the periods of *DrugA* and *DrugB*,  $k'$ , illustrated in Figure 9, and its limit,  $k^*$ , can be derived using:

$$\begin{aligned}
 k' &= \frac{\Delta t}{T_{\min}(\{s_B, r_B, g_B\}, \{s_A, r_A\}, 1/(\mathcal{A}/\mathcal{B})_{\Delta t})} \\
 k^* &= \lim_{\Delta t \rightarrow 0} k' = \lim_{\Delta t \rightarrow 0} \frac{(g_B + r_B - s_B) \Delta t}{\ln \left[ \frac{(r_B - s_B)(r_A - s_B) + g_B(r_B + r_A - s_B - s_A)}{(r_B - s_A)(g_B + (g_B + r_B - s_B)/(\mathcal{A}/\mathcal{B})_{\Delta t})} \right]} \\
 &= \lim_{\Delta t \rightarrow 0} \frac{(g_B + r_B - s_B) \Delta t}{-\ln [g_B + (g_B + r_B - s_B)/(\mathcal{A}/\mathcal{B})_{\Delta t}] + \ln K} \\
 &\quad \text{with } K = \frac{(r_B - s_B)(r_A - s_B) + g_B(r_B + r_A - s_B - s_A)}{r_B - s_A} \\
 &= \lim_{\Delta t \rightarrow 0} \frac{g_B + r_B - s_B}{-\frac{d}{d(\Delta t)} \ln [g_B + (g_B + r_B - s_B)/(\mathcal{A}/\mathcal{B})_{\Delta t}]} \\
 &\quad \text{by L'Hospital's rule} \\
 &= \lim_{\Delta t \rightarrow 0} \frac{g_B + r_B - s_B}{\frac{(g_B + r_B - s_B)(-(\mathcal{A}/\mathcal{B})_{\Delta t}^{-2}) d((\mathcal{A}/\mathcal{B})_{\Delta t})}{g_B + (g_B + r_B - s_B)/(\mathcal{A}/\mathcal{B})_{\Delta t} \quad d(\Delta t)}} \\
 &= \frac{g_B + r_B - s_B}{\frac{(g_B + r_B - s_B)/((\mathcal{A}/\mathcal{B})^*)^2}{g_B + (g_B + r_B - s_B)/(\mathcal{A}/\mathcal{B})^*} (g_A + (g_A + r_A - s_A)(\mathcal{A}/\mathcal{B})^*)} \\
 &\quad \text{since, } \lim_{\Delta t \rightarrow 0} (\mathcal{A}/\mathcal{B})_{\Delta t} = (\mathcal{A}/\mathcal{B})^* \\
 &\quad \text{and } \lim_{\Delta t \rightarrow 0} \frac{d((\mathcal{A}/\mathcal{B})_{\Delta t})}{d(\Delta t)} = g_A + (g_A + r_A - s_A)(\mathcal{A}/\mathcal{B})^* \\
 &= \frac{g_B (\mathcal{A}/\mathcal{B})^* + (g_B + r_B - s_B)}{g_A/(\mathcal{A}/\mathcal{B})^* + (g_A + r_A - s_A)} \\
 &= \frac{(r_A - s_B)((r_A - s_A)(r_B - s_A) + g_A(r_A + r_B - s_A - s_B))}{(r_B - s_A)((r_B - s_B)(r_A - s_B) + g_B(r_A + r_B - s_A - s_B))} \\
 &\quad \text{since, } (\mathcal{A}/\mathcal{B})^* = \frac{r_B - s_A}{r_A - s_B}
 \end{aligned}$$

## 552 A.2 Differential system of instantaneous drug switch

553 The goal of this section is to derive the simple differential equations of  $V = \{A_R, B_R\}$  under  
 554 instantaneous drug switch (Theorem A.8). For the sake of convenience, we want to use matrix  
 555 operations and equations based on the vectors and matrices defined below.

556 **Definition**  $\mathbb{D}_A := \begin{pmatrix} r_A & g_A \\ 0 & s_A - g_A \end{pmatrix}$ ,  $\mathbb{D}_B := \begin{pmatrix} s_B - g_B & 0 \\ g_B & r_B \end{pmatrix}$ ,  $V(t) := \begin{pmatrix} A_R(t) \\ B_R(t) \end{pmatrix}$ ,

557

558  $\mathbb{M}_A(t) := \begin{pmatrix} e^{r_A t} & \frac{g_A (e^{r_A t} - e^{-(g_A - s_A) t})}{g_A + r_A - s_A} \\ 0 & e^{-(g_A - s_A) t} \end{pmatrix}$ ,  $\mathbb{M}_B(t) := \begin{pmatrix} e^{-(g_B - s_B) t} & 0 \\ \frac{g_B (e^{r_B t} - e^{-(g_B - s_B) t})}{g_B + r_B - s_B} & e^{r_B t} \end{pmatrix}$ ,

559

560  $\mathbb{A}_\epsilon := \mathbb{M}_A(f \epsilon)$ ,  $\mathbb{B}_\epsilon := \mathbb{M}_B((1 - f) \epsilon)$ ,

561

$$\begin{aligned} 562 \quad \min [V(t_1), V(t_2), \dots, V(t_n)] &:= \left( \begin{array}{l} \min [A_R(t_1), A_R(t_2), \dots, A_R(t_n)] \\ \min [B_R(t_1), B_R(t_2), \dots, B_R(t_n)] \end{array} \right), \\ 563 \\ 564 \quad \max [V(t_1), V(t_2), \dots, V(t_n)] &:= \left( \begin{array}{l} \max [A_R(t_1), A_R(t_2), \dots, A_R(t_n)] \\ \max [B_R(t_1), B_R(t_2), \dots, B_R(t_n)] \end{array} \right). \end{aligned}$$

565 **Proposition A.1.** *Using Drug A therapy:*

$$566 \quad V'(t) = \mathbb{D}_A V(t), \quad V(t_0 + \Delta t) = \mathbb{M}_A(\Delta t) V(t_0).$$

567 *Using Drug B therapy:*

$$568 \quad V'(t) = \mathbb{D}_B V(t), \quad V(t_0 + \Delta t) = \mathbb{M}_B(\Delta t) V(t_0).$$

569 **Proposition A.2.** *Both  $A_R$  and  $B_R$  are monotonic functions under either therapy. In the presence of*  
 570 *Drug A,  $A_R$  is increasing, and  $B_R$  is decreasing. And, in the presence of Drug B,  $A_R$  is decreasing,*  
 571 *and  $B_R$  is increasing.*

572 **Proposition A.3.**  $\mathbb{A}_\epsilon|_{\epsilon=0} = \mathbb{B}_\epsilon|_{\epsilon=0} = I_2$  for all  $0 \leq f \leq 1$

573 **Proposition A.4.**  $\left. \frac{d}{d\epsilon} \mathbb{A}_\epsilon \right|_{\epsilon=0} = f \mathbb{D}_A$ ,  $\left. \frac{d}{d\epsilon} \mathbb{B}_\epsilon \right|_{\epsilon=0} = (1-f) \mathbb{D}_B$  for all  $0 \leq f \leq 1$

574 **Lemma A.5.**  $\lim_{\epsilon \rightarrow 0} \frac{\mathbb{B}_\epsilon \mathbb{A}_\epsilon - I_2}{\epsilon} = f \mathbb{D}_A + (1-f) \mathbb{D}_B$  for all  $0 \leq f \leq 1$

*Proof.*

$$\begin{aligned} \lim_{\epsilon \rightarrow 0} \frac{\mathbb{B}_\epsilon \mathbb{A}_\epsilon - I_2}{\epsilon} &= \lim_{\epsilon \rightarrow 0} \frac{\frac{d}{d\epsilon} (\mathbb{B}_\epsilon \mathbb{A}_\epsilon - I_2)}{\frac{d}{d\epsilon} \epsilon} && \text{(by L'Hospital's Rule)} \\ &= \lim_{\epsilon \rightarrow 0} \frac{\frac{d\mathbb{B}_\epsilon}{d\epsilon} \mathbb{A}_\epsilon + \mathbb{B}_\epsilon \frac{d\mathbb{A}_\epsilon}{d\epsilon}}{1} \\ &= f \mathbb{D}_A + (1-f) \mathbb{D}_B && \text{(by Propositions A.3 - A.4)} \end{aligned}$$

575 □

576 **Lemma A.6.**  $\lim_{\epsilon \rightarrow 0} \frac{(\mathbb{B}_\epsilon \mathbb{A}_\epsilon)^n - I_2}{n \epsilon} = f \mathbb{D}_A + (1-f) \mathbb{D}_B$  for any positive integer,  $n$ , and for all  
 577  $0 \leq f \leq 1$

*Proof.* Let  $F(n) := \lim_{\epsilon \rightarrow 0} \frac{(\mathbb{B}_\epsilon \mathbb{A}_\epsilon)^n - I_2}{n \epsilon}$  and  $L := f \mathbb{D}_A + (1-f) \mathbb{D}_B$ .

Then, we need to prove that  $F(n) = L$  for  $n = 1, 2, 3, \dots$

If  $n = 1$ ,

$$F(n) = F(1) = L \quad \text{(by Lemma A.5)}$$

Otherwise, if  $n \geq 2$  and  $F(m) = L$  for all  $1 \leq m \leq n-1$ ,

$$\begin{aligned} F(n) &= \lim_{\epsilon \rightarrow 0} \frac{(\mathbb{B}_\epsilon \mathbb{A}_\epsilon)^n - I_2}{n \epsilon} \\ &= \lim_{\epsilon \rightarrow 0} \frac{((\mathbb{B}_\epsilon \mathbb{A}_\epsilon)^{n-1} - I_2)(\mathbb{B}_\epsilon \mathbb{A}_\epsilon) + (\mathbb{B}_\epsilon \mathbb{A}_\epsilon - I_2)}{n \epsilon} \\ &= \frac{n-1}{n} \lim_{\epsilon \rightarrow 0} \frac{((\mathbb{B}_\epsilon \mathbb{A}_\epsilon)^{n-1} - I_2)(\mathbb{B}_\epsilon \mathbb{A}_\epsilon)}{(n-1) \epsilon} + \frac{1}{n} \lim_{\epsilon \rightarrow 0} \frac{\mathbb{B}_\epsilon \mathbb{A}_\epsilon - I_2}{\epsilon} \\ &= \frac{n-1}{n} F(n-1) + \frac{1}{n} F(1) \\ &= \frac{n-1}{n} L + \frac{1}{n} L && \text{(by the inductive assumption)} \\ &= L \end{aligned}$$



578 Therefore, proved. □

579 **Lemma A.7.**  $\lim_{\epsilon \rightarrow 0} \frac{\mathbb{A}_\epsilon(\mathbb{B}_\epsilon \mathbb{A}_\epsilon)^n - I_2}{(n+f)\epsilon} = \frac{(n+1)f}{n+f} \mathbb{D}_A + \frac{n(1-f)}{n+f} \mathbb{D}_B$  for any positive integer,  $n$ , and  
580 for all  $0 \leq f \leq 1$

*Proof.* Using mathematical induction, if  $n = 1$ ,

$$\begin{aligned} & \lim_{\epsilon \rightarrow 0} \frac{\mathbb{A}_\epsilon(\mathbb{B}_\epsilon \mathbb{A}_\epsilon) - I_2}{(1+f)\epsilon} \\ &= \frac{1}{1+f} \lim_{\epsilon \rightarrow 0} \frac{\mathbb{A}_\epsilon(\mathbb{B}_\epsilon \mathbb{A}_\epsilon - I_2) + (\mathbb{A}_\epsilon - I_2)}{\epsilon} \\ &= \frac{1}{1+f} \left[ \lim_{\epsilon \rightarrow 0} \mathbb{A}_\epsilon \lim_{\epsilon \rightarrow 0} \frac{\mathbb{B}_\epsilon \mathbb{A}_\epsilon - I_2}{\epsilon} + \lim_{\epsilon \rightarrow 0} \frac{\mathbb{A}_\epsilon - I_2}{\epsilon} \right] \\ &= \frac{1}{1+f} \left[ I_2(f \mathbb{D}_A + (1-f)\mathbb{D}_B) + \left. \frac{d}{d\epsilon} \mathbb{A}_\epsilon \right|_{\epsilon=0} \right] \quad (\text{by Proposition A.3 and Lemma A.5}) \\ &= \frac{1}{1+f} [(f \mathbb{D}_A + (1-f)\mathbb{D}_B) + f \mathbb{D}_A] \quad (\text{by Proposition A.4}) \\ &= \frac{2f}{1+f} \mathbb{D}_A + \frac{1-f}{1+f} \mathbb{D}_B \quad \text{The equality is true for } n = 1 \end{aligned}$$

If  $n \geq 2$ , and the equality works for all integers  $1 \leq m \leq n-1$ ,

$$\begin{aligned} & \lim_{\epsilon \rightarrow 0} \frac{\mathbb{A}_\epsilon(\mathbb{B}_\epsilon \mathbb{A}_\epsilon)^n - I_2}{(n+f)\epsilon} \\ &= \frac{1}{n+f} \left[ \lim_{\epsilon \rightarrow 0} \frac{(\mathbb{A}_\epsilon(\mathbb{B}_\epsilon \mathbb{A}_\epsilon)^{n-1} - I_2)(\mathbb{B}_\epsilon \mathbb{A}_\epsilon) + (\mathbb{B}_\epsilon \mathbb{A}_\epsilon - I_2)}{\epsilon} \right] \\ &= \frac{1}{n+f} \left[ ((n-1)+f) \lim_{\epsilon \rightarrow 0} \frac{(\mathbb{A}_\epsilon(\mathbb{B}_\epsilon \mathbb{A}_\epsilon)^{n-1} - I_2)}{((n-1)+f)\epsilon} \lim_{\epsilon \rightarrow 0} (\mathbb{B}_\epsilon \mathbb{A}_\epsilon) + \lim_{\epsilon \rightarrow 0} \frac{\mathbb{B}_\epsilon \mathbb{A}_\epsilon - I_2}{\epsilon} \right] \\ &= \frac{1}{n+f} \left[ ((n-1)+f) \left( \frac{nf}{(n-1)+f} \mathbb{D}_A + \frac{(n-1)(1-f)}{(n-1)+f} \mathbb{D}_B \right) (I_2 I_2) \right. \\ & \quad \left. + (f \mathbb{D}_A + (1-f)\mathbb{D}_B) \right] \\ & \quad (\text{by the inductive assumption and Proposition A.3 and Lemma A.5}) \\ &= \frac{(n+1)f}{n+f} \mathbb{D}_A + \frac{n(1-f)}{n+f} \mathbb{D}_B \quad (\text{The equality is true for } n \geq 2) \end{aligned}$$

581 Therefore, proved. □

582 **Theorem A.8.** If Drug A and Drug B are prescribed in turn with a relative intensity of  $f$  and  $1-f$ ,  
583 and are switched instantaneously,  $V$  obeys

$$584 \quad \frac{dV}{dt} = (f \mathbb{D}_A + (1-f)\mathbb{D}_B)V$$

*Proof.* For any time point  $t_0$ , let us define  $V_\epsilon(t)$  as a vector-valued function of  $A_R(t)$  and  $B_R(t)$  describing the cell population dynamics under a periodic therapy starting at  $t_0$  with Drug A assigned at  $t_0 + m\epsilon \leq t < t_0 + (m+f)\epsilon$  and Drug B at  $t_0 + (m+f)\epsilon \leq t < t_0 + (m+1)\epsilon$  for  $m = 0, 1, 2, 3, \dots$ . Then, by Proposition A.1 and the definitions of  $\mathbb{A}$  and  $\mathbb{B}$ ,

$$V_\epsilon(t_0 + m\epsilon) = (\mathbb{B}_\epsilon \mathbb{A}_\epsilon)^m V(t_0), \quad V_\epsilon(t_0 + (m+f)\epsilon) = \mathbb{A}_\epsilon(\mathbb{B}_\epsilon \mathbb{A}_\epsilon)^m V(t_0) \quad \dots (*1)$$

where  $V(t_0) = \begin{pmatrix} A_R(t_0) \\ B_R(t_0) \end{pmatrix}$ . And,  $V_0(t)$  represents instantaneous drug switching.

For any  $\Delta t > 0$  and any positive integer  $n$ , there exists  $\epsilon = \epsilon(n, \Delta t)$  such that

$$\frac{\Delta t}{n+1} < \epsilon \leq \frac{\Delta t}{n} \quad \text{or} \quad 1 \leq \frac{\Delta t}{n\epsilon} < 1 + \frac{1}{n}.$$

Then by the squeeze theorem,

$$\lim_{\Delta t \rightarrow 0} \epsilon(n, \Delta t) = 0 \text{ for any positive integer } n, \text{ and } \lim_{n \rightarrow \infty} \frac{\Delta t}{n\epsilon(n, \Delta t)} = 1 \text{ for any } \Delta t > 0. \quad \dots (*2)$$

For such  $\Delta t$ ,  $n$  and  $\epsilon(n, \Delta t)$ ,  $V_\epsilon(t_0 + \Delta t)$  is bounded, since local extrema can occur only when drugs are switched by Proposition A.2. That is,

$$\begin{aligned} \min [V_\epsilon(t_0 + n\epsilon), V_\epsilon(t_0 + (n+f)\epsilon), V_\epsilon(t_0 + (n+1)\epsilon)] &\leq V_\epsilon(t_0 + \Delta t) \\ &\leq \max [V_\epsilon(t_0 + n\epsilon), V_\epsilon(t_0 + (n+f)\epsilon), V_\epsilon(t_0 + (n+1)\epsilon)], \end{aligned} \quad \dots (*3)$$

Also,

$$\begin{aligned} &\lim_{\Delta t \rightarrow 0} \frac{\lim_{n \rightarrow \infty} V_{\epsilon(n, \Delta t)}(t_0 + n\epsilon(n, \Delta t)) - V(t_0)}{\Delta t} \\ &= \lim_{\Delta t \rightarrow 0} \lim_{n \rightarrow \infty} \frac{(\mathbb{B}_\epsilon \mathbb{A}_\epsilon)^n - I_2}{\Delta t} V(t_0) \quad \text{(by (*1))} \\ &= \frac{\lim_{\Delta t \rightarrow 0} \lim_{n \rightarrow \infty} [(\mathbb{B}_\epsilon \mathbb{A}_\epsilon)^n - I_2] / (n\epsilon)}{\lim_{\Delta t \rightarrow 0} \lim_{n \rightarrow \infty} \Delta t / (n\epsilon)} V(t_0) \\ &= \frac{\lim_{n \rightarrow \infty} [\lim_{\Delta t \rightarrow 0} [(\mathbb{B}_\epsilon \mathbb{A}_\epsilon)^n - I_2] / (n\epsilon)]}{\lim_{\Delta t \rightarrow 0} [\lim_{n \rightarrow \infty} \Delta t / (n\epsilon)]} V(t_0) \\ &= \frac{\lim_{n \rightarrow \infty} [\lim_{\epsilon \rightarrow 0} [(\mathbb{B}_\epsilon \mathbb{A}_\epsilon)^n - I_2] / (n\epsilon)]}{\lim_{\Delta t \rightarrow 0} 1} V(t_0) \quad \text{by (*2)} \\ &= \lim_{n \rightarrow \infty} [f \mathbb{D}_A + (1-f) \mathbb{D}_B] V(t_0) \quad \text{(by Lemma A.6)} \\ &= (f \mathbb{D}_A + (1-f) \mathbb{D}_B) V(t_0). \quad \dots (*4) \end{aligned}$$

And,

$$\begin{aligned} &\lim_{\Delta t \rightarrow 0} \frac{\lim_{n \rightarrow \infty} V_{\epsilon(n, \Delta t)}(t_0 + (n+f)\epsilon(n, \Delta t)) - V(t_0)}{\Delta t} \\ &= \lim_{\Delta t \rightarrow 0} \lim_{n \rightarrow \infty} \frac{\mathbb{A}_\epsilon (\mathbb{B}_\epsilon \mathbb{A}_\epsilon)^n - I_2}{\Delta t} V(t_0) \quad \text{(by (*1))} \\ &= \frac{\lim_{\Delta t \rightarrow 0} \lim_{n \rightarrow \infty} [\mathbb{A}_\epsilon (\mathbb{B}_\epsilon \mathbb{A}_\epsilon)^n - I_2] / ((n+f)\epsilon)}{\lim_{\Delta t \rightarrow 0} \lim_{n \rightarrow \infty} \Delta t / ((n+f)\epsilon)} V(t_0) \\ &= \frac{\lim_{n \rightarrow \infty} [\lim_{\Delta t \rightarrow 0} [(\mathbb{B}_\epsilon \mathbb{A}_\epsilon)^n - I_2] / ((n+f)\epsilon)]}{\lim_{\Delta t \rightarrow 0} [\lim_{n \rightarrow \infty} (\Delta t / (n\epsilon)) (n / (n+f))]} V(t_0) \\ &= \frac{\lim_{n \rightarrow \infty} [\lim_{\epsilon \rightarrow 0} [(\mathbb{B}_\epsilon \mathbb{A}_\epsilon)^n - I_2] / ((n+f)\epsilon)]}{\lim_{\Delta t \rightarrow 0} 1} V(t_0) \quad \text{by (*2)} \\ &= \lim_{n \rightarrow \infty} \left[ \frac{(n+1)f}{n+f} \mathbb{D}_A + \frac{n(1-f)}{n+f} \mathbb{D}_B \right] V(t_0) \quad \text{(by Lemma A.7)} \\ &= (f \mathbb{D}_A + (1-f) \mathbb{D}_B) V(t_0) \quad \dots (*5) \end{aligned}$$

Similar to (\*4),

$$\lim_{\Delta t \rightarrow 0} \frac{\lim_{n \rightarrow \infty} V_{\epsilon(n, \Delta t)}(t_0 + (n+1)\epsilon(n, \Delta t)) - V(t_0)}{\Delta t} = (f \mathbb{D}_A + (1-f)\mathbb{D}_B)V(t_0) \quad \dots (*6)$$

By (\*4) - (\*6),

$$\begin{aligned} & \min \left[ \lim_{\Delta t \rightarrow 0} \frac{\lim_{n \rightarrow \infty} V_{\epsilon}(t_0 + n\epsilon) - V(t_0)}{\Delta t}, \lim_{\Delta t \rightarrow 0} \frac{\lim_{n \rightarrow \infty} V_{\epsilon}(t_0 + (n+f)\epsilon) - V(t_0)}{\Delta t}, \right. \\ & \left. \lim_{\Delta t \rightarrow 0} \frac{\lim_{n \rightarrow \infty} V_{\epsilon}(t_0 + (n+1)\epsilon) - V(t_0)}{\Delta t} \right] = \max \left[ \lim_{\Delta t \rightarrow 0} \frac{\lim_{n \rightarrow \infty} V_{\epsilon}(t_0 + n\epsilon) - V(t_0)}{\Delta t}, \right. \\ & \left. \lim_{\Delta t \rightarrow 0} \lim_{\Delta t \rightarrow 0} \frac{\lim_{n \rightarrow \infty} V_{\epsilon}(t_0 + (n+f)\epsilon) - V(t_0)}{\Delta t}, \lim_{\Delta t \rightarrow 0} \frac{\lim_{n \rightarrow \infty} V_{\epsilon}(t_0 + (n+1)\epsilon) - V(t_0)}{\Delta t} \right] \\ & = (f \mathbb{D}_A + (1-f)\mathbb{D}_B)V(t_0) \quad \dots (*7) \end{aligned}$$

585 Then, by (\*3), (\*7) and the squeeze theorem,

$$586 \quad \left. \frac{d}{dt} V_0 \right|_{t=t_0} = \lim_{\Delta t \rightarrow 0} \frac{\lim_{n \rightarrow \infty} V_{\epsilon}(t_0 + \Delta t) - V(t_0)}{\Delta t} = (f \mathbb{D}_A + (1-f)\mathbb{D}_B)V(t_0)$$

587 Therefore,

$$588 \quad \frac{dV}{dt} = (f \mathbb{D}_A + (1-f)\mathbb{D}_B)V$$

589 □

### 590 A.3 Population dynamics with the optimal regimen

591 **In this section, we want to write the differential equations of  $V = \{A_R, B_R\}$  under the op-**  
 592 **timal control strategy described in Section 3.3. Based on Appendix A.2 and a couple of**  
 593 **lemma/theorem, we will reach to a concise form of a differential system described at The-**  
 594 **orem A.11.**

595 **Lemma A.9.**  $\left\{ \frac{r_A r_B - s_A s_B}{r_A + r_B - s_A - s_B}, \begin{pmatrix} (\mathcal{A}/\mathcal{B})^* \\ 1 \end{pmatrix} \right\}$  is an eigen pair of  $f^* \mathbb{D}_A + (1-f^*)\mathbb{D}_B$  with  
 596  $(\mathcal{A}/\mathcal{B})^*$  and  $f^* = k^*/(1+k^*)$  defined by Equations (9) and (12).

597 *Proof.* Let  $\mathbb{D}^* := f^* \mathbb{D}_A + (1-f^*)\mathbb{D}_B$ , and  $\lambda = \frac{r_A r_B - s_A s_B}{r_A + r_B - s_A - s_B}$ . Then,

$$598 \quad \mathbb{D}^* - \lambda I_2 = C_1 \begin{pmatrix} C_2 U^T \\ C_3 U^T \end{pmatrix},$$

where  $U = \begin{pmatrix} 1 \\ -(\mathcal{A}/\mathcal{B})^* \end{pmatrix}$  along with

$$\begin{aligned} C_1 &= -(g_A(r_A - s_B) + g_B(r_B - s_A) + (r_B - s_A)(r_A - s_B))(r_A + r_B - s_A - s_B)/(r_A - s_B), \\ C_2 &= g_A((r_A - s_B)(r_B - s_B) + g_B(r_A + r_B - s_A - s_B)), \\ C_3 &= -g_B((r_B - s_A)(r_A - s_A) + g_A(r_A + r_B - s_A - s_B)). \end{aligned}$$

599 Since  $U^T V = 0$  where  $V = ((r_B - s_A)/(r_A - s_B), 1)^T$ ,  $(\lambda, V)$  is an eigen pair of  $\mathbb{D}^*$ . □

600 **Theorem A.10.** In Stage 2 of the optimal strategy, both  $A_R$  and  $B_R$  change with a constant net-  
 601 proliferation rate,

602

$$\lambda = \frac{r_A r_B - s_A s_B}{r_A + r_B - s_A - s_B}.$$

603 *Proof.* Without a loss of generality, let us prove it only when  $\mathcal{A}/\mathcal{B}(0) < (\mathcal{A}/\mathcal{B})^*$ .

604

If  $\mathcal{A}/\mathcal{B}(0) < (\mathcal{A}/\mathcal{B})^*$ , *DrugA* has a better effect initially. So following the optimal therapy scheduling, *DrugA* is assigned alone at the beginning as long as  $T_{min}^A = T_{min}(p_A, p_B, \mathcal{A}/\mathcal{B}(0))$  (Stage 1), and then Stage 2 starts at  $T_{min}^A$  with initial condition

$$V(T_{min}^A) = \mathbb{M}_A(T_{min}^A)V(0) = C \begin{pmatrix} (\mathcal{A}/\mathcal{B})^* \\ 1 \end{pmatrix} \quad \dots (**1)$$

605

where  $C = \frac{P(0)}{1 + \mathcal{A}/\mathcal{B}(0)} \left( \frac{(r_A - s_A)(r_B - s_A) + g_A(r_A + r_B - s_A - s_B)}{(r_A - s_B)(g_A + \mathcal{A}/\mathcal{B}(0)(g_A + r_A - s_A))} \right)^{-\frac{g_A - s_A}{g_A + r_A - s_A}}$ .

606

607 By Theorem A.8, in Stage 2,  $V(t)$  obeys

$$\frac{dV}{dt} = \mathbb{D}^*V, \text{ where } \mathbb{D}^* = f^*\mathbb{D}_A + (1 - f^*)\mathbb{D}_B \quad \dots (**2)$$

609

By Lemma A.9,  $V(T_{min}^A)$  is an eigenvector of  $\mathbb{D}^*$  with the corresponding eigenvalue,  $\lambda$ . Then, the solution of (\*\*2) with the initial value (\*\*1) is

610

$$V(t + T_{min}^A) = e^{\lambda t}V(T_{min}^A).$$

611

612

□

613 **Theorem A.11.** *With optimal therapy utilizing DrugA and DrugB, V obeys the following equa-*  
614 *tions and solutions.*

615

616 *If*  $\mathcal{A}/\mathcal{B}(0) < (\mathcal{A}/\mathcal{B})^*$ ,

$$\frac{dV}{dt} = \begin{cases} \mathbb{D}_A V & \text{if } 0 \leq t \leq T_{min}^A \\ \lambda V & \text{if } t > T_{min}^A \end{cases} \quad \text{and } V(t) = \begin{cases} \mathbb{M}_A(t)V(0) & \text{if } 0 \leq t \leq T_{min}^A \\ e^{\lambda(t - T_{min}^A)}V(T_{min}^A) & \text{if } t > T_{min}^A \end{cases}$$

618

Similarly if  $\mathcal{A}/\mathcal{B}(0) \geq (\mathcal{A}/\mathcal{B})^*$ ,

$$\frac{dV}{dt} = \begin{cases} \mathbb{D}_B V & \text{if } 0 \leq t \leq T_{min}^B \\ \lambda V & \text{if } t > T_{min}^B \end{cases} \quad \text{and } V(t) = \begin{cases} \mathbb{M}_B(t)V(0) & \text{if } 0 \leq t \leq T_{min}^B \\ e^{\lambda(t - T_{min}^B)}V(T_{min}^B) & \text{if } t > T_{min}^B \end{cases}$$

620

*Proof.* Straightforward, by Theorem A.10

□

## 621 Appendix B Sensitivity analysis on optimal scheduling

622 The two determinant quantities of optimal control scheduling are (i) the duration of the first stage  
623 ( $T_{min}^1$ ), and (ii) the relative intensity between two drugs in the second stage ( $k^*$ ). Here, we show  
624 sensitivity analysis on the quantities related to them,  $T_{gap}$  and  $f^*$ , over a range of (scaled) model pa-  
625 rameters. Additionally over the same range, we studied how much our  $T_{min}$ -based optimal scheme  
626 is better than the  $T_{max}$ -based scheme evaluated by the integral in equation (13).

627

### 628 1. Sensitivity analysis of $T_{gap}$

629

630 Using  $g_1$ , we non-dimensionalize all the values, like

$$631 \quad \{\bar{s}_1, \bar{r}_1 | \bar{s}_2, \bar{r}_2\} := \frac{1}{g_1} \{s_1, r_1 | s_2, r_2\} \quad \text{and} \quad \overline{T_{gap}} := g_1 T_{gap}$$

632 then,

$$\overline{T_{gap}}(\{\bar{s}_1, \bar{r}_1\}, \{\bar{s}_2, \bar{r}_2\}) := \frac{\ln \left[ \frac{(1 - \bar{s}_1)(\bar{r}_1 - \bar{s}_1)(\bar{r}_1 - \bar{s}_2)}{\bar{r}_1((\bar{r}_1 - \bar{s}_1)(\bar{r}_2 - \bar{s}_1) + (\bar{r}_1 + \bar{r}_2 - \bar{s}_1 - \bar{s}_2))} \right]}{1 + \bar{r}_1 - \bar{s}_1}$$

633 In general, cells mutate slower than they proliferate, so we ran sensitivity analysis on  $T_{gap}$   
 634 for all  $a \gg 1$  for  $a \in \{-\bar{s}_1, -\bar{s}_2, \bar{r}_1, \bar{r}_2\}$ . Figure 12 shows  $T_{gap}$  over the range of  $20 \leq$   
 635  $-\bar{s}_1, -\bar{s}_2, \bar{r}_1, \bar{r}_2 \leq 100$ . So, under the assumption that  $g_1 \ll \min\{-s_1, -s_2, r_1, r_2\}$ ,

$$636 \quad T_{gap}(\{s_1, r_1\}, \{s_2, r_2\}) \approx \frac{\ln \left[ \frac{-s_1(r_1 - s_2)}{r_1(r_2 - s_1)} \right]}{r_1 - s_1},$$

637 which approximates the contour curves of Figure 12.

638

## 639 2. Sensitivity analysis of $f^*$

640

641 Regarding the regulated intensities among the two drugs,  $k^*$ , we assumed that  $g_1 \approx g_2 :=$   
 642  $g$ , similarly assuming that they are both much smaller than  $\{-s_1, -s_2, r_1, r_2\}$ . Then we  
 643 normalized all the parameters with the unit of  $g$ , like

$$644 \quad \{\bar{s}_1, \bar{r}_1 | \bar{s}_2, \bar{r}_2\} := \frac{1}{g} \{s_1, r_1 | s_2, r_2\}.$$

645  $k^*$  can be rewritten in terms of the dimensionless parameters.

$$k^*(\{\bar{s}_1, \bar{r}_1\}, \{\bar{s}_2, \bar{r}_2\}) = \frac{(\bar{r}_1 - \bar{s}_2)((\bar{r}_1 - \bar{s}_1)(\bar{r}_2 - \bar{s}_1) + (\bar{r}_1 + \bar{r}_2 - \bar{s}_1 - \bar{s}_2))}{(\bar{r}_2 - \bar{s}_1)((\bar{r}_2 - \bar{s}_2)(\bar{r}_1 - \bar{s}_2) + (\bar{r}_1 + \bar{r}_2 - \bar{s}_1 - \bar{s}_2))}$$

646 In this sensitivity analysis, we use

$$f^* := \frac{k^*}{1 + k^*},$$

647 which represents intensity fraction of the initially better drug out of the total therapy. We  
 648 evaluated  $f^*$  over the same ranges of  $\{s_1, s_2, r_1, r_2\}$ , like the previous exercise (see Figure  
 649 13) over the range  $\max\{g_1, g_2\} \ll \min\{-s_1, -s_2, r_1, r_2\}$ , so  $k^*$  and  $f^*$  can be approximated  
 650 by the simpler forms:

$$651 \quad k^* \approx \frac{r_1 - s_1}{r_2 - s_2} \quad \text{and} \quad f^* \approx \frac{r_1 - s_1}{r_1 + r_2 - s_1 - s_2}$$

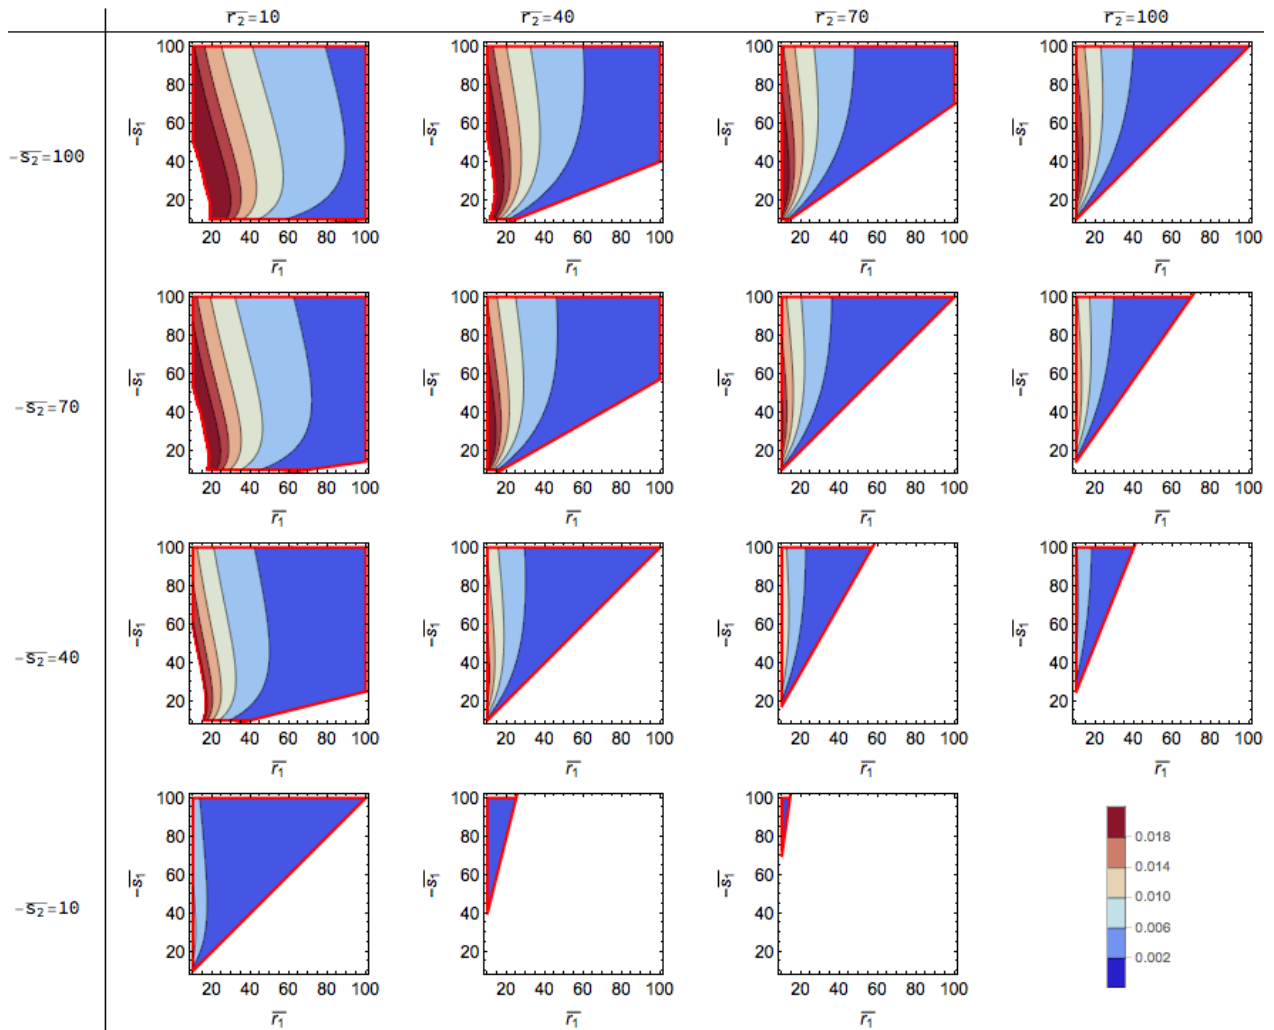

Figure 12: **Contour maps of  $T_{gap}$**  over ranges of  $10 \leq a \leq 100$  for  $a \in \{-\bar{s}_1, -\bar{s}_2, \bar{r}_1, \bar{r}_2\} = \{-s_1, -s_2, r_1, r_2\}/g_1$  and  $r_1 r_2 < s_1 s_2$  (Condition (6)). As  $-\bar{s}_2$  decreases and/or  $\bar{r}_2$  increases, the optimal switching timing to the second drug is delayed ( $T_{min} \uparrow$  and  $T_{gap} \downarrow$ ). As  $\bar{r}_1$  increases,  $T_{gap}$  decreases. Also,  $T_{gap}$  and  $s_1$  have a non-monotonic relationship as shown on the graphs.

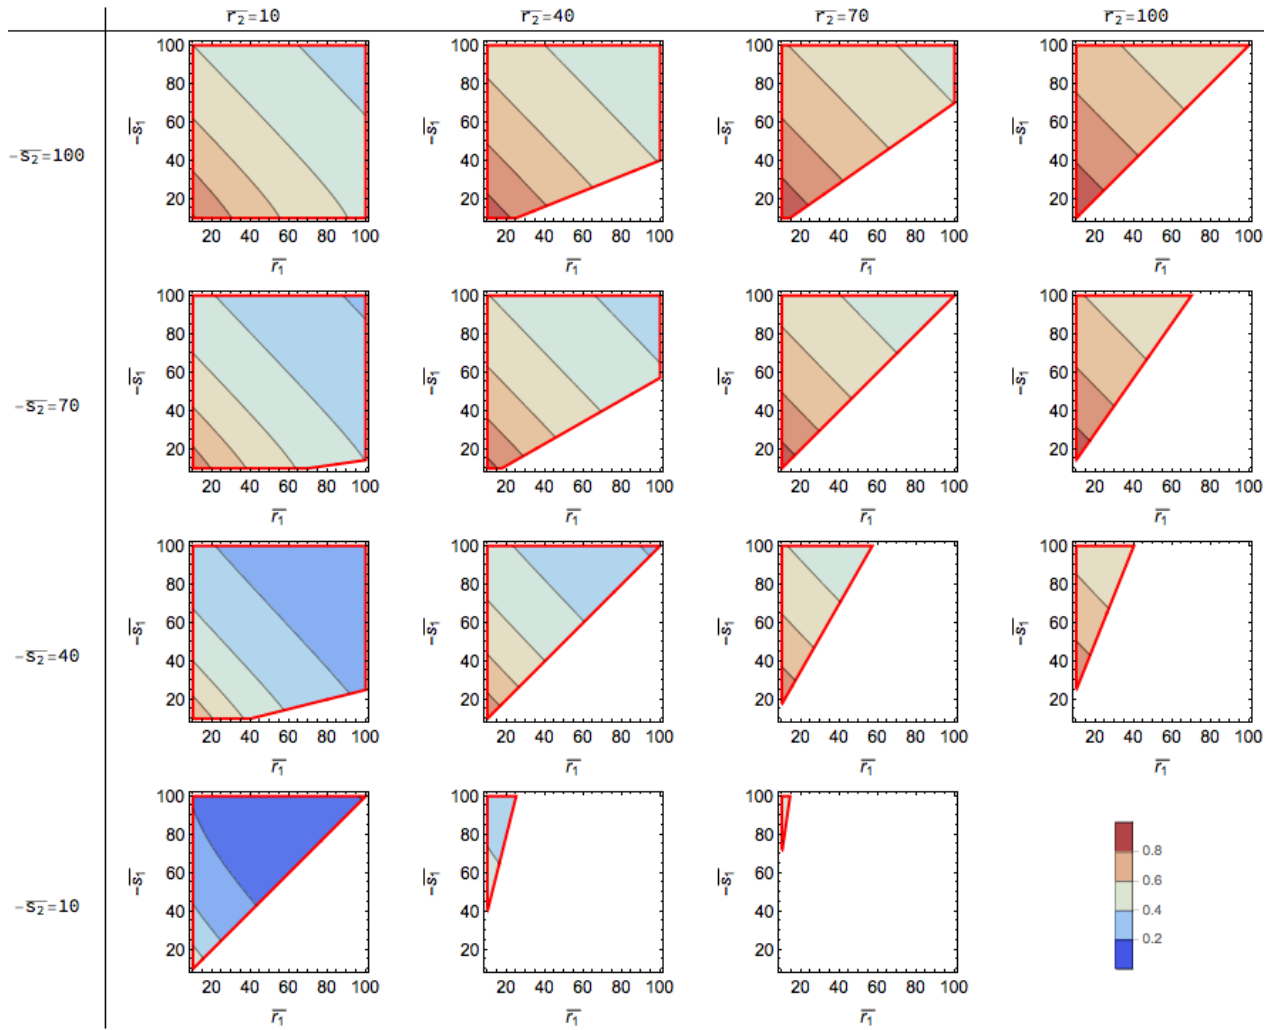

Figure 13: **Contour maps of  $f^*$**  over ranges of  $10 \leq a \leq 100$  for  $a \in \{-\bar{s}_1, -\bar{s}_2, \bar{r}_1, \bar{r}_2\} = \{-s_1, -s_2, r_1, r_2\}/g$  and  $r_1 r_2 < s_1 s_2$  (Condition 6).  $k^*$  (or  $f^*$ ) increases, as  $r_1$  and/or  $-\bar{s}_1$  decreases and/or as  $r_2$  and/or  $-\bar{s}_2$  increases.

652 3. Sensitivity analysis of Integral (13)

653  
654 To study the sensitivity of the advantage of using the optimal control defined by Integral (13),  
655 we assumed that  $g_1 \approx g_2 \approx g = 0.001$ . Then similar to the previous studies, we explored the  
656 sensitivity of the normalized parameters in terms of  $g$ , that is:

$$657 \{\bar{s}_1, \bar{r}_1 | \bar{s}_2, \bar{r}_2\} := \frac{1}{g} \{s_1, r_1 | s_2, r_2\}.$$

658 **Appendix C Clinical implementation of instantaneous switch**  
659 **in the optimal strategy**

660 In clinical practice, the instantaneous drug-switch which we suggest in the second stage of the op-  
661 timal treatment scheduling is not implementable. Therefore, we compared similar schedules to the  
662 optimal case. In the “similar” schedules, the first stage, using an initial drug, remained the same as  
663 the optimal schedule. However the second part, where we previously used an instantaneous switch  
664 (with  $\Delta t = 0$ ), was modified to use a fast switch ( $\Delta t \gtrsim 0$ ). Figure 15 (a) and (b) shows how in-  
665 stantaneous switching ( $\Delta t = 0$ ) and fast switching (multiple choices of  $\Delta t \gtrsim 0$ ) compare in terms  
666 of population size using different drug parameters. As expected, the smaller  $\Delta t$  is, the closer to  
667 the ideal case. And, a choice of a reasonably small  $\Delta t$  (like 1 day or 3 days) results in an outcome  
668 quite close to the optimal scenario.

669  
670 We repeated this exercise with  $k^*$  (from equation (12)) instead of  $k(\Delta t)$  modulated by  $\Delta t$  (Fig-  
671 ure 15 (c) and (d)). Only small differences are observed between Figure 15 (a) and (b) and Figure  
672 15 (c) and (d), which justifies the general usefulness of  $k^*$  independent of  $\Delta t$ .

673



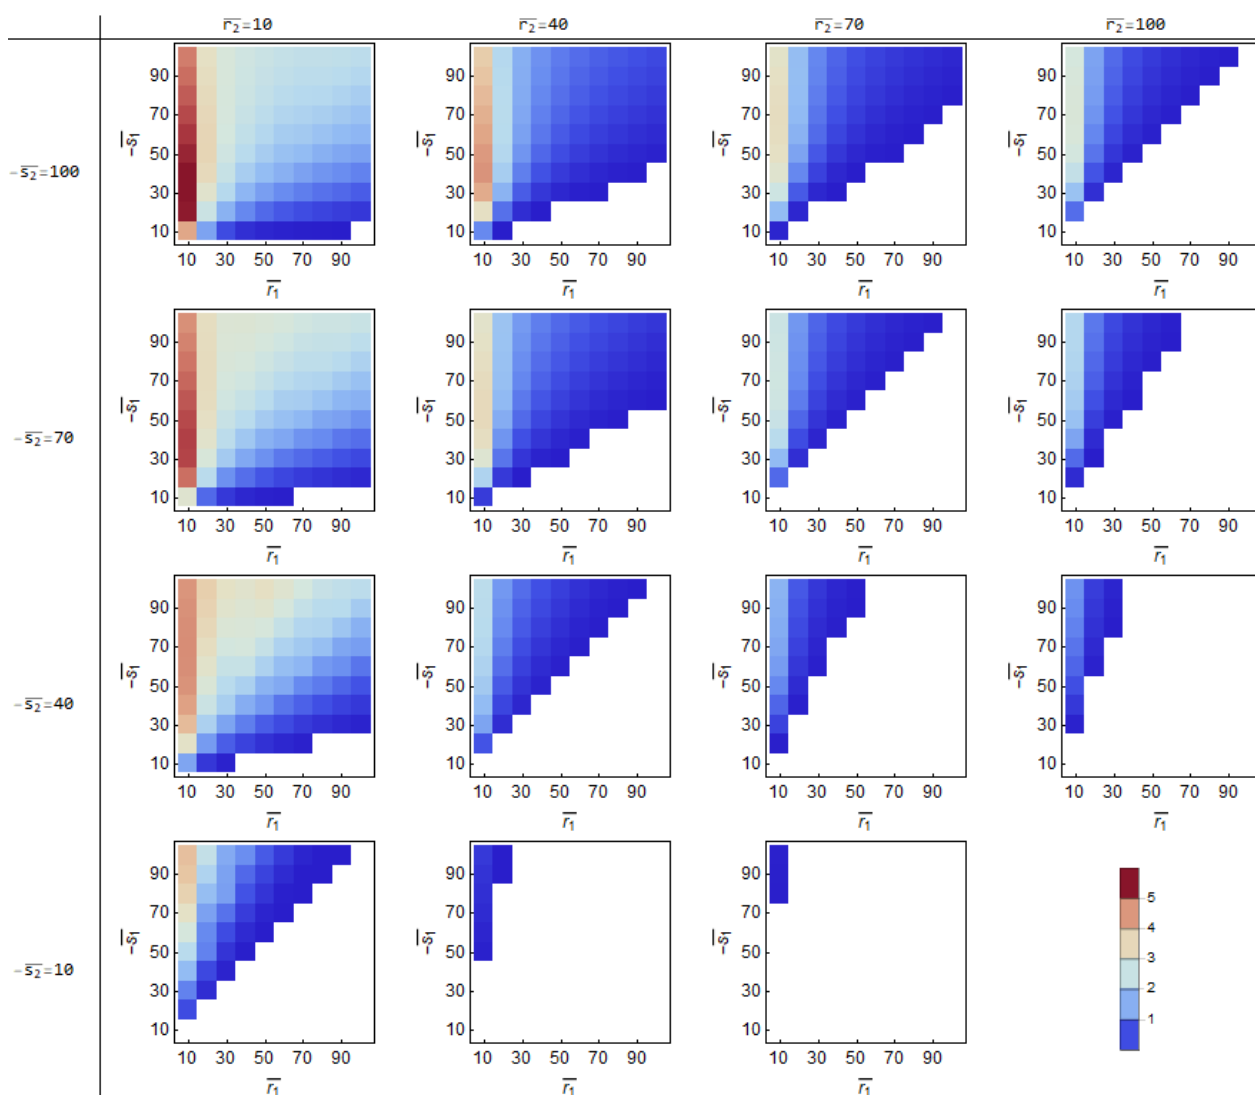

Figure 14: **Contour maps of the measured advantageous effect of the optimal therapy** defined by the integration (13) over ranges of  $10 \leq a \leq 100$  for  $a \in \{-\bar{s}_1, -\bar{s}_2, \bar{r}_1, \bar{r}_2\}$  and  $r_1 r_2 < s_1 s_2$  (Condition (6)) Here,  $\{-\bar{s}_1, -\bar{s}_2, \bar{r}_1, \bar{r}_2\} = \{-s_1, -s_2, r_1, r_2\}/g$  and  $g = 0.001$ . The measured effect increases as  $r_1, r_2$  decreases and/or  $-s_1$  increases.

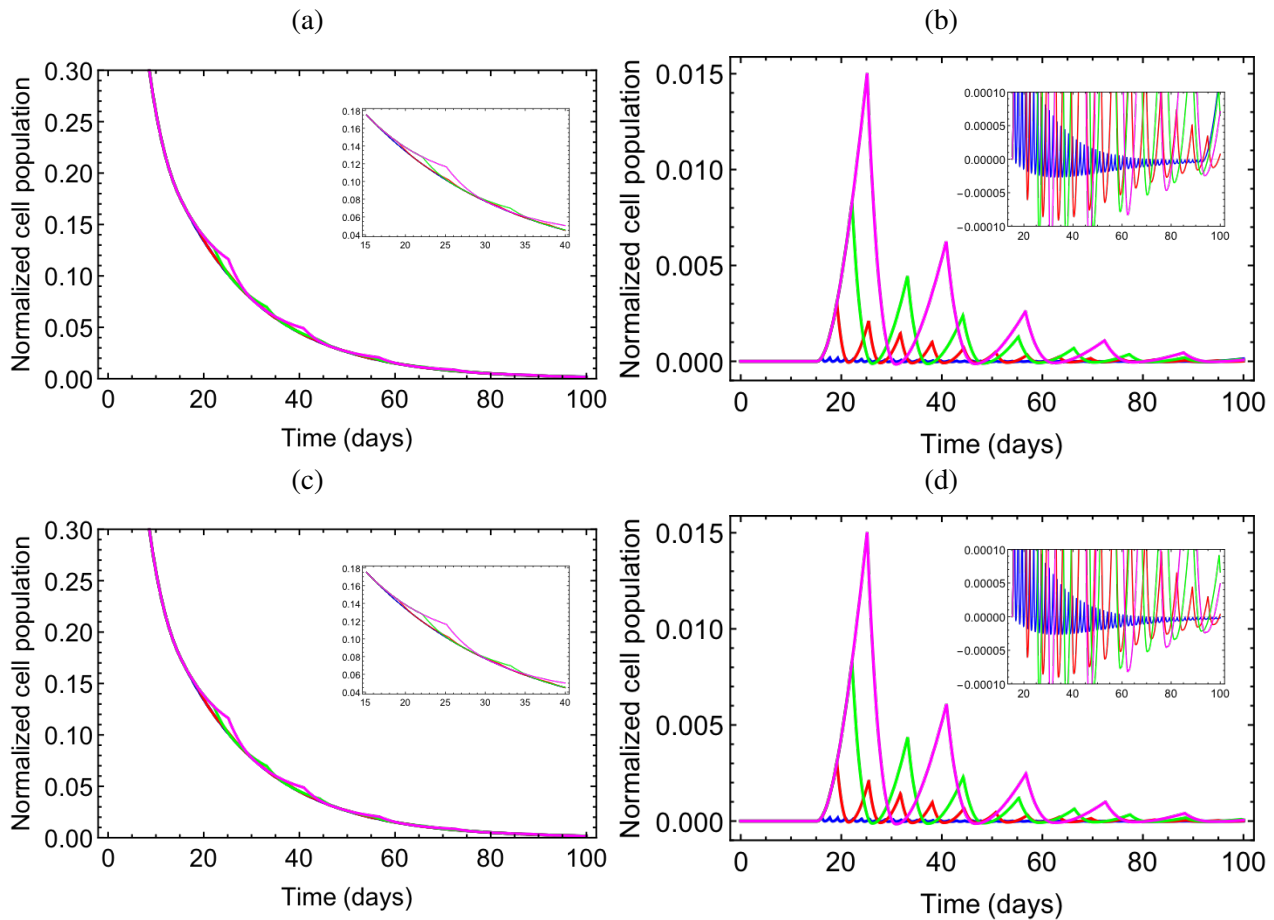

Figure 15: **Graphs showing regular drug switching in Stage 2 with different  $\{\Delta t, k(\Delta t, p_A, p_B)\}$ :**  $\Delta t = 1$  day (blue),  $\Delta t = 4$  days (red),  $\Delta t = 7$  days (green), and  $\Delta t = 10$  days (magenta). Parameters/conditions:  $p_A = \{-0.18, 0.008, 0.00075\}/\text{day}$ ,  $p_B = \{-0.9, 0.016, 0.00125\}/\text{day}$  and  $\{A_R^0, B_R^0\} = \{0.1, 0.9\}$  (a) Total population histories,  $C_P^n$  for  $n \in \{1, 4, 7, 10\}$  days (b) Differences between the optimal population history  $C_P^*$ , (i.e., when  $\Delta t = 0$ ) and each case with positive  $\Delta t$ . (i.e.,  $C_P^n - C_P^*$ ). The inserts interesting ranges. (c) and (d) are equivalent with (a) and (b) except that  $k^*(p_A, p_B)$  has been used instead of  $k(\Delta t, p_A, p_B)$

## 674 Appendix D Stochastic simulation codes

675 The computational code written in Python will be provided at *GitHub* ([https://github.com/nryoon12/Optimal-](https://github.com/nryoon12/Optimal-Therapy-Scheduling-Based-on-a-Pair-of-Collaterally-Sensitive-Drugs)  
 676 [Therapy-Scheduling-Based-on-a-Pair-of-Collaterally-Sensitive-Drugs](https://github.com/nryoon12/Optimal-Therapy-Scheduling-Based-on-a-Pair-of-Collaterally-Sensitive-Drugs)).
